# Supplementary material
Source: publisher figshare collection journal article supplement (https://gsapubs.figshare.com/ndownloader/files/23314511)
Supplement: Supplementary file 1 [file 23314511]

## Sheet: Sheet1
Table DR1 Part A & B. Inventory of geochronological data (n=735) dating to Marine Isotope Stage 3 (MIS 3; ca. 57,000 to ca. 29,000 yr BP) that are located in the Last Glacial Maximum (LGM) ice extent of the Laurentide Ice Sheet. This table is divided into two sections: data from the Hudson Bay Lowlands (n=35) and all other data (n=700). In each section, sites are arranges from east to west. Uncal…
† calibrated age should be viewed with caution because it impinges on the limits of the 14C calibration curve
* age is uncalibrated because it exceeds 46,401 14C yr BP
Table DR1 Part A: Data from the Hudson Bay Lowlands. Ordered east to west (n=35 sites).
Lab code	Site name	Lat	Long	Sample type	14C yr BP	Age assignment	Reference
TO-125	Prest Sea Type	50.32	-81.63	14C AMS (carbonate)	40040 ± 400	43300 ± 750	Andrews (1987)
TO-1751	Adam Creek	50.17	-82.08	14C AMS (wood)	34990 ± 360	39500 ± 850	Dalton et al. (2016)
TO-2503	Kwataboahegan Marine	51.14	-82.12	14C AMS (carbonate)	48260 ± 1090	48300 ± 1100*	McNeely (2002)
GSC-1475 outer	Kwataboahegan Marine	51.14	-82.12	14C Conv. (carbonate)	38200 ± 2000	41900 ± 3750	Blake 1988; McNelly 2002
TO-1752	Moose	50.42	-82.33	14C AMS (wood)	39230 ± 500	43000 ± 850	Dalton et al. (2016)
UOC-0594	14-PJB-008	51.92	-82.63	14C AMS (peat)	42146 ± 458	45500 ± 850	Dalton et al. (2016)
TO-1753	24M	50.31	-82.7	14C AMS (wood)	37250 ± 490	41700 ± 800	Dalton et al. (2016)
L-369B cellulose	24M	50.31	-82.7	14C Conv. (peat)	39700 ± 2900	43500 ± 5450	Olson and Broecker (1957, 1959)
L-369B lignin	24M	50.31	-82.7	14C Conv. (peat)	40600 ± 3000	44300 ± 5200	Olson and Broecker (1957, 1959)
L-369B lignin	24M	50.31	-82.7	14C Conv. (wood)	40700 ± 4100	44100 ± 6350†	Olson and Broecker (1957, 1959)
L-369B cellulose	24M	50.31	-82.7	14C Conv. (wood)	40500 ± 3200	44200 ± 5450	Olson and Broecker (1957, 1959)
UOC-0597	14-PJB-007	51.93	-82.72	14C AMS (peat)	38829 ± 350	42700 ± 500	Dalton et al. (2016)
ISGS A2460	12-PJB-002	50.46	-83.67	14C AMS (wood)	34050 ± 490	38500 ± 1350	Dalton et al. (2016)
ISGS A2424	12-PJB-007	50.49	-83.87	14C AMS (wood)	46500 ± 2100	46500 ± 2100*	Dalton et al. (2016)
UOC-0590	12-PJB-007	50.49	-83.87	14C AMS (wood)	45593 ± 1249	48600 ± 1750†	Dalton et al. (2016)
UOC-0591	11-PJB-020	50.48	-83.88	14C AMS (peat)	37627 ± 225	42000 ± 400	Dalton et al. (2016, 2017)
UOC-0592	11-PJB-020	50.48	-83.88	14C AMS (peat)	49586 ± 949	49600 ± 950*	Dalton et al. (2016, 2017)
BG3800	12-PJB-109	50.87	-84.85	luminescence (OSL)		42800 ± 3750	Dalton et al. (2016)
UOC-0593	13-PJB-003	50.88	-84.86	14C AMS (peat)	26273 ± 131	30600 ± 350	Dalton et al. (2016)
UOC-0589	13-PJB-003	50.88	-84.86	14C AMS (wood)	49586 ± 949	49600 ± 950*	Dalton et al. (2016)
TO-1894	Attawapiskat Marine	52.35	-86.25	14C AMS (carbonate)	29210 ± 220	33000 ± 750	McNeely (2002)
TO-1892	Attawapiskat Marine	52.35	-86.25	14C AMS (carbonate)	30790 ± 230	34400 ± 450	McNeely (2002)
TO-1893	Attawapiskat Marine	52.35	-86.25	14C AMS (carbonate)	33480 ± 310	37200 ± 950	McNeely (2002)
TO-2502	Attawapiskat Marine	52.35	-86.25	14C AMS (carbonate)	35930 ± 370	40100 ± 900	McNeely (2002)
TO-2501	Attawapiskat Marine	52.35	-86.25	14C AMS (carbonate)	38530 ± 460	42300 ± 650	McNeely (2002)
BG3808	Severn Marine	55.43	-88.2	luminescence (OSL)		42200 ± 4000	Dalton et al. (2016)
BG3807	Severn Marine	55.43	-88.2	luminescence (OSL)		52500 ± 5050	Dalton et al. (2016)
WAT-1378	Beaver	55.92	-88.32	14C Conv. (peat)	37400 ± 1600	41600 ± 2900	Wyatt (1989)
ISGS A1656	11-PJB-186	56.61	-89.29	14C AMS (wood)	45700 ± 1300	48600 ± 1750†	Dalton et al. (2016)
UOC-0587	11-PJB-186	56.61	-89.29	14C AMS (wood)	49586 ± 949	49600 ± 950*	Dalton et al. (2016)
ISGS A1995	11-PJB-186	56.61	-89.29	14C AMS (wood)	50100 ± 3300	50100 ± 3300*	Dalton et al. (2016)
EKN-7	Port Nelson	57.13	-92.53	luminescence (TL)		38000 ± 3000	Berger and Nielsen (1990)
EKN-8	Flamborough	57.03	-92.64	luminescence (TL)		46000 ± 4000	Berger and Nielsen (1990)
EKN-5	Henday	56.46	-94.15	luminescence (TL)		32000 ± 2000	Berger and Nielsen (1990)
EKN-3	Leslie Creek	56.42	-94.24	luminescence (TL)		34000 ± 5000	Berger and Nielsen (1990)
Table DR1 Part B: Data from outside the Hudson Bay Lowlands. Ordered east to west (n=700 sites).
Lab code	Site name	Lat	Long	Sample type	14C yr BP	Age assignment	Reference
SI-4519	Upper South Branch Pond	46.08	-68.9	14C (wood)	29200 ± 500	33300 ± 1200	Anderson et al. (1988)
Beta-237891	Great Dantzic Cove	46.98	-55.97	14C AMS (carbonate)	39370 ± 450	42800 ± 700	Bell et al. (2008)
Beta-237892	Great Dantzic Cove	46.98	-55.97	14C AMS (carbonate)	39810 ± 470	43200 ± 800	Bell et al. (2008)
GSC-4563	Fiods Cove	48.51	-58.96	14C Conv. (carbonate)	26600 ± 550	30300 ± 1050	McNeely and McCuaig (1991)
GSC-3381	Dingwall Series	46.9	-60.45	14C Conv. (wood)	32700 ± 560	36800 ± 1450	Blake (1984)
GSC-3636	Bay St Lawrence	47.01	-60.45	14C Conv. (wood)	44200 ± 820	47500 ± 1800	Blake (1984)
GSC-1220-2	Middle River	46.14	-60.92	14C Conv. (bone, antler, tooth, tusk)	31300 ± 500	35200 ± 1000	Blake (1984)
GSC-1220	Middle River	46.14	-60.92	14C Conv. (bone, antler, tooth, tusk)	32000 ± 630	35900 ± 1550	Blake (1984)
GSC-3206	Big Brook	45.81	-61.22	14C Conv. (organic-rich sediment)	36200 ± 1280	40600 ± 2400	Blake (1984)
GSC-1408	Grantville	45.64	-61.24	14C Conv. (carbonate)	32100 ± 900	35700 ± 2000	Blake (1984)
QL-979	Cape Dyer	66.81	-61.58	14C Conv. (carbonate)	37200 ± 800	41300 ± 1400	Miller (1979)
OSL55	Entry - Cap Blanc	47.27	-61.7	luminescence (OSL)		51000 ± 4000	Remillard et al. (2017)
OSL53	Entry - Cap Blanc	47.27	-61.7	luminescence (OSL)		55000 ± 5000	Remillard et al. (2017)
GSC-4640 HP	Millerand	47.22	-61.85	14C Conv. (organic-rich sediment)	39000 ± 500	42900 ± 800	McNeely and Jorgensen (1992)
GSC-5978	Portage-du-Cap	47.24	-61.9	14C Conv. (carbonate)	31000 ± 710	34600 ± 1350	McNeely (2006)
GSC-4633 HP	Portage-du-Cap	47.23	-61.9	14C Conv. (carbonate)	42900 ± 720	45800 ± 1400	McNeely and McCuaig (1991)
UQ-1648	Portage-du-Cap	47.24	-61.9	14C (carbonate)	39000 ± 1200	42600 ± 2000	This sample was mentioned in McNeely (2006); original publication unknown
GSC-4018	Cape George	45.88	-61.92	14C Conv. (carbonate)	35600 ± 990	39700 ± 2200	Blake (1986)
OSL08	AC-Lighthouse	47.21	-61.97	luminescence (OSL)		38300 ± 3000	Rémillard et al. (2016)
UCIAMS-41189	Anse à la Cabane	47.22	-61.99	14C AMS (wood)	47100 ± 2700	47100 ± 2700*	Rémillard et al. (2013)
UCIAMS-84792	Anse à la Cabane	47.22	-61.99	14C AMS (wood)	47100 ± 2300	47100 ± 2300*	Rémillard et al. (2013)
UCIAMS-84793	Anse à la Cabane	47.22	-61.99	14C AMS (wood)	47800 ± 2500	47800 ± 2500*	Rémillard et al. (2013)
UCIAMS-74417	Anse à la Cabane	47.22	-61.99	14C AMS (wood)	50100 ± 3300	50100 ± 3300*	Rémillard et al. (2013)
OSL03	Anse à la Cabane	47.22	-61.99	luminescence (OSL)		41000 ± 4000	Rémillard et al. (2016)
OSL04	Anse à la Cabane	47.22	-61.99	luminescence (OSL)		44000 ± 4000	Rémillard et al. (2016)
I-3236	Addington Forks	45.57	-62.1	14C (organic-rich sediment)	33700 ± 2300	37900 ± 4450	MacNeill 1969; Lowdon and Blake (1973)
GSC-3848 HP	Addington Forks	45.57	-62.1	14C Conv. (wood)	36100 ± 520	40700 ± 1050	McNeely and McCuaig (1991)
CAMS-30538	Saddle Lake	67.07	-62.7	14C AMS (plants, seeds)	52300 ± 3900	52300 ± 3900*	Steig et al. (1998)
CAMS-28655	Gnarly Lake	67.2	-63.04	14C AMS (plants, seeds)	44600 ± 1500	47800 ± 2300†	Steig et al. (1998)
96B3-1 (10Be age)	Mitten Peninsula location 4	67.16	-63.16	cosmogenic exposure (10Be)		51900 ± 0	Steig et al. (1998)
96B3-1 (26Al age)	Mitten Peninsula location 4	67.16	-63.16	Cosmogenic exposure (26Al)		52100 ± 0	Steig et al. (1998)
CAMS-31807	Fog Lake	67.18	-63.25	14C AMS (organic-rich sediment)	34790 ± 510	39300 ± 1150	Steig et al. (1998); Wolfe et al. (2000)
CAMS-34301	Fog Lake	67.18	-63.25	14C AMS (organic-rich sediment)	36020 ± 450	40600 ± 950	Steig et al. (1998); Wolfe et al. (2000)
CAMS-30537	Fog Lake	67.18	-63.25	14C AMS (plants, seeds)	32300 ± 470	36200 ± 1300	Steig et al. (1998); Wolfe et al. (2000)
CAMS-44451	Fog Lake	67.18	-63.25	14C AMS (organic-rich sediment)	38600 ± 520	42600 ± 750	Wolfe et al. (2000)
CAMS-44450	Fog Lake	67.18	-63.25	14C AMS (organic-rich sediment)	39150 ± 520	43000 ± 850	Wolfe et al. (2000)
GSC-3950	Delabarre Bay	59.03	-63.27	14C Conv. (carbonate)	33700 ± 710	37500 ± 1700	McNeely and McCuaig (1991)
GSC-4189	Delabarre Bay	59.03	-63.27	14C Conv. (carbonate)	37800 ± 1610	41600 ± 2950	McNeely and McCuaig (1991)
GSC-4204 OF	Delabarre Bay	59.03	-63.27	14C Conv. (carbonate)	38900 ± 1420	42600 ± 2450	McNeely and McCuaig (1991)
GSC-4204 IF	Delabarre Bay	59.03	-63.27	14C Conv. (carbonate)	40600 ± 1640	43900 ± 2750	McNeely and McCuaig (1991)
96B1-1 (10Be age)	Mitten Peninsula location 3	67.17	-63.27	cosmogenic exposure (10Be)		35600 ± 0	Steig et al. (1998)
96B1-2 (10Be age)	Mitten Peninsula location 3	67.17	-63.27	cosmogenic exposure (10Be)		36300 ± 0	Steig et al. (1998)
96B1-1 (26Al age)	Mitten Peninsula location 3	67.17	-63.27	Cosmogenic exposure (26Al)		34200 ± 0	Steig et al. (1998)
96B1-2 (26Al age)	Mitten Peninsula location 3	67.17	-63.27	Cosmogenic exposure (26Al)		36700 ± 0	Steig et al. (1998)
UQ-510	île d’Anticosti site B	49.42	-63.52	14C (carbonate)	29060 ± 1050	32700 ± 1900	Gratton et al. (1984)
UQ-514	île d’Anticosti site B	49.42	-63.52	14C (carbonate)	36000 ± 1200	40100 ± 2500	Gratton et al. (1984)
UQ-509	île d’Anticosti site H	49.41	-63.57	14C (carbonate)	28100 ± 200	31400 ± 400	Gratton et al. (1984)
UQ-553	île d’Anticosti site F	49.48	-63.59	14C (carbonate)	36000 ± 3500	39500 ± 6650	Gratton et al. (1984)
QL-974	Padloping Island	67.55	-63.77	14C Conv. (carbonate)	44000 ± 1000	46900 ± 2050	Miller (1979)
CM66	CM66	65	-63.82	cosmogenic exposure (10Be)		44400 ± 2650	Kaplan (1999)
DIC-517	Near Miriam Lake	59.55	-63.83	14C Conv. (carbonate)	42730 ± +6680, -9770	41900 ± 11150†	Ives (1977)
SI-4131	Iron Strand	59.55	-63.83	14C Conv. (carbonate)	34360 ± 850	38300 ± 2050	Short, 1981
CM40 (10Be)	CM40 (10Be)	65.06	-63.96	cosmogenic exposure (10Be)		38100 ± 2750	Kaplan (1999)
CM40 (26Al)	CM40 (26Al)	65.06	-63.96	cosmogenic exposure (26Al)		34600 ± 2250	Kaplan (1999)
CM13 (10Be)	CM13 (10Be)	65.05	-64.12	cosmogenic exposure (10Be)		54400 ± 3200	Kaplan (1999)
CM13 (26Al)	CM13 (26Al)	65.05	-64.12	cosmogenic exposure (26Al)		45500 ± 3000	Kaplan (1999)
AA-8892	Robinson Lake	63.4	-64.26	14C AMS (other organic material)	30050 ± 435	34100 ± 800	Miller et al. (1999)
AA-9009	Robinson Lake	63.4	-64.26	14C AMS (other organic material)	32200 ± 620	36200 ± 1550	Miller et al. (1999)
CAMS-7782	Robinson Lake	63.4	-64.26	14C AMS (other organic material)	37770 ± 1360	41900 ± 2450	Miller et al. (1999)
CAMS-22178	Robinson Lake	63.4	-64.26	14C AMS (other organic material)	43030 ± 1420	46400 ± 2750	Miller et al. (1999)
AA-8995	Robinson Lake	63.4	-64.26	14C AMS (other organic material)	43600 ± 1200	46900 ± 2350	Miller et al. (1999)
AA-7591	Robinson Lake	63.4	-64.26	14C AMS (plants, seeds)	29170 ± 420	33300 ± 1050	Miller et al. (1999)
AA-7592	Robinson Lake	63.4	-64.26	14C AMS (plants, seeds)	38050 ± 1100	42200 ± 1900	Miller et al. (1999)
AA-7839	Robinson Lake	63.4	-64.26	14C AMS (plants, seeds)	38000 ± 1100	42200 ± 1900	Miller et al. (1999)
AA-8891	Robinson Lake	63.4	-64.26	14C AMS (plants, seeds)	38540 ± 1200	42600 ± 2050	Miller et al. (1999)
AA-8568	Robinson Lake	63.4	-64.26	14C AMS (plants, seeds)	42700 ± 2000	46100 ± 3350	Miller et al. (1999)
AA-7844	Robinson Lake	63.4	-64.26	14C AMS (plants, seeds)	43140 ± 2000	46500 ± 3250	Miller et al. (1999)
GSC-1656	St. Patrick Bay	81.83	-64.42	14C Conv. (organic-rich sediment)	28100 ± 380	32000 ± 900	Lowdon et al. (1977); England (1978)
QC-446	Loks Land	62.4	-64.65	14C Conv. (carbonate)	41900 ± +7100, -3700	43200 ± 8800†	Miller (1979)
GSC-2467	Hillsborough	45.91	-64.66	14C Conv. (carbonate)	51500 ± 1270	51500 ± 1300*	Blake (1983)
GSC-2469	Hillsborough	45.91	-64.66	14C Conv. (organic-rich sediment)	37200 ± 1310	41500 ± 2350	Blake (1983)
AA-7557	Beare Sound	62.5	-64.83	14C AMS (carbonate)	40950 ± 2100	44300 ± 3800	Kaufman and Williams (1992)
QL-1179	Home Bay - Uivaruluk Member	68.04	-64.98	14C Conv. (peat)	50700 ± +2000, -1600	50700 ± 2000*	Miller (1979)
CM24	CM24	65.13	-65.01	cosmogenic exposure (10Be)		36300 ± 2350	Kaplan (1999)
QL-1180	Middle Uivarvluk	68.05	-65.06	14C Conv. (peat)	42400 ± 800	45700 ± 1550	Miller (1979)
QL-1181	Home Bay - Quavig/Uivarvluk	66.05	-65.08	14C Conv. (carbonate)	47800 ± +1300, -1100	47800 ± 1300*	Miller (1979)
AA-6304	Inner Cyrus Field Bay	62.97	-65.25	14C AMS (carbonate)	43450 ± 2100	46400 ± 3350	Kaufman and Williams (1992)
GX-16635	Cyrus Field Lake	63.18	-65.53	14C (carbonate)	30600 ± 1900	34700 ± 3950	Kaufman and Williams (1992)
TO-2196	Pangnirtung Ice-cored moraine	66.15	-65.72	14C (carbonate)	52460 ± 1430	52500 ± 1450*	Kaufman and Williams (1992)
TO-3242	Tuligak Lake	66.28	-65.72	14C AMS (plants, seeds)	36120 ± 340	40800 ± 750	Wolfe and Härting (1996)
OS-17676	Amarok Lake	66.27	-65.75	14C AMS (organic-rich sediment)	38600 ± 280	42600 ± 450	Fréchette et al. (2006)
OS-18066	Amarok Lake	66.27	-65.75	14C AMS (other organic material)	47900 ± 780	47900 ± 800*	Fréchette et al. (2006)
OS-18067	Amarok Lake	66.27	-65.75	14C AMS (other organic material)	46000 ± 640	49200 ± 1000†	Fréchette et al. (2006)
TO-3241	Ukalik Lake	66.27	-65.75	14C AMS (plants, seeds)	37990 ± 410	42200 ± 600	McNeely and Atkinson (1995); Wolfe and Härting (1996)
TO-2912	Daly River	81.23	-65.87	14C AMS (carbonate)	42400 ± 580	45300 ± 1050	England (1996)
St.4325	Cape Defrosse	81.25	-65.92	14C Conv. (carbonate)	27950 ± 5400	31600 ± 11100	England (1978)
GSC-1440 (outer)	Salmon R	44.06	-66.18	14C Conv. (carbonate)	37500 ± 1300	41400 ± 2300	Blake (1984)
GSC-1440	Salmon R	44.06	-66.18	14C Conv. (carbonate)	38600 ± 1300	42300 ± 2250	Blake (1984)
GSC-1440 (inner)	Salmon R	44.06	-66.18	14C Conv. (carbonate)	38600 ± 1300	42300 ± 2250	Blake (1984)
AA-14027	South Reefs	61.91	-66.31	14C AMS (carbonate)	38620 ± 1110	42300 ± 1900	Manley and Jennings (1996)
AA-4244A	Nanook Harbour	61.96	-66.62	14C AMS (carbonate)	37090 ± 1100	41100 ± 1950	Kaufman and Williams (1992)
AA-4244B	Nanook Harbour	61.96	-66.62	14C AMS (carbonate)	40630 ± 1400	43900 ± 2250	Kaufman and Williams (1992)
TO-2916	Panikpah River	81.03	-66.67	14C AMS (carbonate)	29420 ± 280	33200 ± 750	England (1996)
AA-6298	Sister Islets	62.02	-66.91	14C AMS (carbonate)	35685 ± 805	39800 ± 1700	Kaufman and Williams (1992)
CR03-13 (10Be)	CR03-13 (10Be)	69.74	-67.15	cosmogenic exposure (10Be)		34200 ± 900	Briner et al. (2006)
CR03-13 (26Al)	CR03-13 (26Al)	69.74	-67.15	cosmogenic exposure (26Al)		37800 ± 1400	Briner et al. (2006)
AA-2348	Pritzler Harbour	62.08	-67.25	14C AMS (carbonate)	43000 ± 3000	45900 ± 4100†	Kaufman and Williams (1992)
GSC-426	Pritzler Harbour	62.17	-67.35	14C Conv. (carbonate)	34800 ± 1100	38800 ± 2500	Lowdon et al., (1967)
QL-976-2	McBeth Fiord	69.47	-67.55	14C (bone, antler, tooth, tusk)	47000 ± +1400, -1200	47000 ± 1400*	Miller (1979)
CAD02-2 (10Be)	CAD02-2 (10Be)	69.89	-67.62	cosmogenic exposure (10Be)		33200 ± 900	Briner et al. (2006)
CR03-26 (26Al)	CR03-26 (26Al)	69.53	-67.65	cosmogenic exposure (26Al)		29500 ± 1200	Briner et al. (2006)
AA-2224	Bond Inlet	62.22	-67.72	14C AMS (carbonate)	39000 ± 1800	42600 ± 3200	Kaufman and Williams (1992)
AA-10646	Bond Inlet site	62.17	-67.74	14C AMS (carbonate)	34710 ± 690	38800 ± 1750	Manley and Jennings (1996)
AA-11450	Bond Inlet site 2	62.21	-67.88	14C AMS (carbonate)	31065 ± 455	34600 ± 850	Manley and Jennings (1996)
AA-10647	Saddleback Island	62.16	-67.95	14C AMS (carbonate)	24035 ± 240	27800 ± 450	Manley and Jennings (1996)
AA-12608	Saddleback Island	62.16	-67.95	14C AMS (carbonate)	34820 ± 730	38900 ± 1850	Manley and Jennings (1996)
OS-3170	Joe Mary Pond	45.58	-68.04	14C AMS (organic-rich sediment)	24500 ± 130	28500 ± 350	Dorion (1997)
OS-3468	Lake 9	46.42	-68.05	14C (wood)	41200 ± 1400	44700 ± 2450	Dorion (1997)
QL-188	Clyde Foreland	70.42	-68.07	14C Conv. (organic-rich sediment)	50400 ± +1000, -900	50400 ± 1000*	Miller et al. (1977)
AA-11451	Wight Inlet	62.23	-68.23	14C AMS (carbonate)	35280 ± 760	39400 ± 1850	Manley and Jennings (1996)
AA-11453	Wight Inlet 2	62.24	-68.33	14C AMS (carbonate)	40760 ± 1450	44000 ± 2350	Manley and Jennings (1996)
AA-11452	Gary Goose Islands	62.26	-68.38	14C AMS (carbonate)	39145 ± 1180	42800 ± 1950	Manley and Jennings (1996)
TO-2921	Valley D-4	80.7	-68.48	14C AMS (carbonate)	26930 ± 170	30800 ± 300	England (1996)
CF02-179 (10Be)	CF02-179 (10Be)	70.44	-68.52	cosmogenic exposure (10Be)		31500 ± 800	Briner et al. (2006)
CF02-179 (26Al)	CF02-179 (26Al)	70.44	-68.52	cosmogenic exposure (26Al)		30800 ± 1200	Briner et al. (2006)
CF02-7	Kuvinilk River Basin	70.55	-68.61	cosmogenic exposure (10Be)		34700 ± 1100	Briner et al. (2005)
CF02-8	80-m asl marine limit	70.19	-68.61	cosmogenic exposure (10Be)		42600 ± 1200	Briner et al. (2005)
AA45385	CR01-6a	70.52	-68.65	14C AMS (carbonate)	39200 ± 1200	42800 ± 2000	Briner (2003); Dunhill et al. (2004)
OS-6435	Isie Lake	47.07	-68.66	14C AMS (organic-rich sediment)	24300 ± 110	28300 ± 350	Dorion (1997)
AA-10252	Balcom Inlet	62.33	-68.66	14C AMS (carbonate)	30790 ± 450	34400 ± 800	Manley and Jennings (1996)
CF02-22	Kuvinilk River Basin	70.53	-68.7	cosmogenic exposure (10Be)		37700 ± 1000	Briner et al. (2005)
GSC-796	Cape Christian foreland	70.63	-68.75	14C Conv. (carbonate)	40000 ± 1740	43500 ± 3000	Ives and Buckley (1969); Lowdon et al. (1971); Miller et al. (1977)
CF02-63	Kuvinilk River Basin	70.6	-68.76	cosmogenic exposure (10Be)		42200 ± 1100	Briner et al. (2005)
CF1-01-1	Kuvinilk River Basin	70.56	-68.77	cosmogenic exposure (10Be)		48600 ± 1500	Briner et al. (2005)
CF02-14	Kuvinilk River Basin	70.55	-68.8	cosmogenic exposure (10Be)		32300 ± 900	Briner et al. (2005)
CF02-13	Kuvinilk River Basin	70.55	-68.8	cosmogenic exposure (10Be)		33900 ± 900	Briner et al. (2005)
CF2-01-1	Kuvinilk River Basin	70.51	-68.8	cosmogenic exposure (10Be)		35200 ± 1000	Briner et al. (2005)
CF02-115	Uplands adjacent to Patricia Bay	70.35	-68.81	cosmogenic exposure (10Be)		39800 ± 1000	Briner et al. (2005)
CF02-15	Kuvinilk River Basin	70.55	-68.81	cosmogenic exposure (10Be)		43500 ± 1200	Briner et al. (2005)
CF02-114 (26Al)	CF02-114 (26Al)	70.35	-68.81	cosmogenic exposure (26Al)		54000 ± 1300	Briner et al. (2006)
QL-186	Clyde Foreland	70.67	-68.83	14C Conv. (carbonate)	39600 ± 1740	43100 ± 3000	Miller et al. (1977)
CF2-01-2	Kuvinilk River Basin	70.53	-68.85	cosmogenic exposure (10Be)		31700 ± 800	Briner et al. (2005)
CF02-130	Kuvinilk River Basin	70.43	-68.85	cosmogenic exposure (10Be)		38600 ± 1000	Briner et al. (2005)
AL3-01-1	Kuvinilk River Basin	70.52	-68.87	cosmogenic exposure (10Be)		44800 ± 1100	Briner et al. (2005)
CF02-18	Kuvinilk River Basin	70.57	-68.88	cosmogenic exposure (10Be)		44100 ± 1100	Briner et al. (2005)
SIV6-00-1	Kuvinilk River Basin	70.36	-68.92	cosmogenic exposure (10Be)		31400 ± 1000	Briner et al. (2005)
SIV6-00-2	Kuvinilk River Basin	70.36	-68.92	cosmogenic exposure (10Be)		31800 ± 1000	Briner et al. (2005)
TO-3488	Lake Hazen	81.95	-68.92	14C AMS (plants, seeds)	43510 ± 690	46700 ± 1500	Smith (1999)
CF02-153	Kuvinilk River Basin	70.47	-68.93	cosmogenic exposure (10Be)		53200 ± 1500	Briner et al. (2005)
GSC-414	Barrier Inlet	62.38	-68.97	14C Conv. (carbonate)	30200 ± 1500	33800 ± 3050	Lowdon et al. (1967)
CF02-147	Kuvinilk River Basin	70.42	-68.99	cosmogenic exposure (10Be)		42300 ± 1000	Briner et al. (2005)
CF02-163	Kuvinilk River Basin	70.44	-69.01	cosmogenic exposure (10Be)		39300 ± 1000	Briner et al. (2005)
IBP02-1a (10Be)	IBP02-1a (10Be)	70.21	-69.07	cosmogenic exposure (10Be)		32500 ± 1100	Briner et al. (2006)
IBP02-1a (26Al)	IBP02-1a (26Al)	70.21	-69.07	cosmogenic exposure (26Al)		31800 ± 800	Briner et al. (2006)
IBP02-2a	IBP02-2a	70.22	-69.09	cosmogenic exposure (10Be)		34000 ± 900	Briner et al. (2006)
QL-183	Clyde Foreland	70.72	-69.11	14C Conv. (carbonate)	47700 ± 700	47700 ± 700*	Miller et al. (1977)
CF02-40	80-m asl marine limit	70.71	-69.15	cosmogenic exposure (10Be)		40900 ± 1000	Briner et al. (2005)
CF02-67	Eglinton region	70.73	-69.15	cosmogenic exposure (10Be)		50900 ± 2400	Briner et al. (2005)
QL-136	Clyde Foreland	70.63	-69.15	14C Conv. (carbonate)	33600 ± 800	37400 ± 1900	Miller et al. (1977)
NSRL13213	CI01-11	70.29	-69.17	14C (carbonate)	34120 ± 170	38200 ± 550	Briner (2003); Dunhill et al. (2004)
AA45384	CI01011	70.29	-69.17	14C AMS (carbonate)	28510 ± 390	32000 ± 950	Briner (2003); Dunhill et al. (2004)
QL-184_unpublished	Clyde Foreland	70.29	-69.17	14C Conv. (carbonate)	34900 ± +2100, -1700	38700 ± 4000	Miller et al. (1977)
QL-184	Clyde Foreland	70.29	-69.17	14C Conv. (carbonate)	40000 ± 300	43300 ± 600	Miller et al. (1977)
CF02-82	Eglinton region	70.78	-69.22	cosmogenic exposure (10Be)		38900 ± 1000	Briner et al. (2005)
CF02-77	Eglinton region	70.75	-69.22	cosmogenic exposure (10Be)		52600 ± 1400	Briner et al. (2005)
CF02-92	Eglinton region	70.7	-69.26	cosmogenic exposure (10Be)		38700 ± 1000	Briner et al. (2005)
CF02-88	80-m asl marine limit	70.74	-69.35	cosmogenic exposure (10Be)		40700 ± 1000	Briner et al. (2005)
TO-3714	Riviere Verte	47.77	-69.48	14C AMS (bone, antler, tooth, tusk)	40640 ± 420	44200 ± 850	Harington (2003)
TO-3484	Rawlings Bay	80.35	-69.57	14C AMS (carbonate)	39880 ± 510	43200 ± 850	England (1996)
AA43172	CR1-00-1	70.48	-69.58	14C AMS (carbonate)	45800 ± 2400	47800 ± 2700†	Briner (2003); Dunhill et al. (2004)
TO-3483	Rawlings Bay	80.35	-69.58	14C AMS (carbonate)	27440 ± 210	31100 ± 300	England (1996)
AL02-11 (10Be)	AL02-11 (10Be)	70.49	-69.66	cosmogenic exposure (10Be)		50000 ± 1200	Briner et al. (2006)
AL02-11 (26Al)	AL02-11 (26Al)	70.49	-69.66	cosmogenic exposure (26Al)		50300 ± 1700	Briner et al. (2006)
Beta-54140	Saguenay	48.14	-69.68	14C AMS (carbonate)	29280 ± 680	32900 ± 1400	Dionne and Occhietti (1996)
TO-3990	Saguenay	48.14	-69.68	14C AMS (carbonate)	34510 ± 380	38600 ± 1100	Dionne and Occhietti (1996)
TO-4205	Mesa Creek	81.9	-69.78	14C AMS (plants, seeds)	37260 ± 470	41700 ± 800	Smith (1999)
CF02-51	Kuvinilk River Basin	70.54	-69.93	cosmogenic exposure (10Be)		30500 ± 1000	Briner et al. (2005)
QL-973	Clyde Cliffs	70	-70	14C Conv. (carbonate)	45800 ± 1000	48600 ± 1650†	Miller (1979)
TO-3479	Kane Basin	80.22	-70.05	14C AMS (carbonate)	37970 ± 430	41900 ± 650	England (1996)
TO-3478	Kane Basin	80.22	-70.05	14C AMS (carbonate)	38530 ± 450	42300 ± 650	England (1996)
TO-3480	Kane Basin	80.22	-70.05	14C AMS (carbonate)	45040 ± 800	47900 ± 1750	England (1996)
TO-3481	Kane Basin	80.22	-70.05	14C AMS (carbonate)	49410 ± 1070	49400 ± 1100*	England (1996)
TO-3768	Kane Basin	80.22	-70.12	14C AMS (carbonate)	34600 ± 350	38700 ± 950	England (1996)
TO-3476	Kane Basin	80.22	-70.12	14C AMS (carbonate)	40310 ± 530	43600 ± 900	England (1996)
AA-7899	Bosanquet Harbour	62.63	-70.48	14C AMS (carbonate)	34790 ± 710	38900 ± 1800	Manley and Jennings (1996)
AA-12606	Ashe Inlet	62.6	-70.54	14C AMS (carbonate)	37760 ± 1050	41700 ± 1800	Manley and Jennings (1996)
AA-12605	Ashe Inlet 2	62.6	-70.54	14C AMS (carbonate)	43750 ± 2100	46700 ± 3250†	Manley and Jennings (1996)
TO-3424	Petite-Rivière	47.31	-70.56	14C AMS (wood)	52900 ± 1560	52900 ± 1600*	mentioned in McNeely and Atkinson (1995); original publication unknown
CR03-88 (10Be)	CR03-88 (10Be)	69.88	-70.6	cosmogenic exposure (10Be)		47800 ± 1200	Briner et al. (2006)
CR03-88 (26Al)	CR03-88 (26Al)	69.88	-70.6	cosmogenic exposure (26Al)		42800 ± 1300	Briner et al. (2006)
I-2581	Sam Fiord	70.98	-70.62	14C Conv. (carbonate)	36250 ± 3600	39700 ± 6900	Ives and Buckley (1969)
TO-4204	Radmore Harbour	80.52	-70.63	14C AMS (carbonate)	28570 ± 970	32300 ± 1800	England (1996)
QL-177	Cape Smith	71.11	-70.81	14C Conv. (carbonate)	45200 ± 800	48100 ± 1700	Miller et al. (1977)
GSC-5722	Scoresby Bay	79.88	-71.48	14C Conv. (carbonate)	31310 ± 950	34900 ± 2100	England (1996); McNeely (2006)
AA-10232	Wales Island	61.87	-72.07	14C AMS (carbonate)	38700 ± 1200	42400 ± 2050	Manley and Jennings (1996)
QC-559	Deschaillons	46.55	-72.11	14C Conv. (carbonate)	34900 ± +1625, -1350	39200 ± 3250	Hillaire-Marcel (1979); Hillaire-Marcel and Page (1980)
QC-279	Deschaillons	46.55	-72.11	14C Conv. (carbonate)	36280 ± 2410	40300 ± 4600	Hillaire-Marcel (1979); Hillaire-Marcel and Page (1980); Barrette et al. (1981)
QC-357	Deschaillons	46.55	-72.11	14C Conv. (carbonate)	37500 ± +2300, -1800	41500 ± 4400	Hillaire-Marcel (1979); Hillaire-Marcel and Page (1980); Barrette et al. (1981)
Gx-9531	Deschaillons	46.55	-72.11	14C Conv. (carbonate)	35100 ± +3070, -2420	39100 ± 5850	Lamothe (1985)
UC-484	Riviere aux vaches 99-F	46.04	-72.76	14C (carbonate)	26000 ± 2300	30100 ± 4500	Lamothe (1985)
UC-525	Riviere aux vaches 99-F	46.04	-72.76	14C (carbonate)	32500 ± 900	36600 ± 2000	Lamothe (1985)
UC-130	Riviere aux vaches 99-C	46.04	-72.76	14C (carbonate)	28000 ± 760	32100 ± 1450	Lamothe (1985)
I-25894	Pierreville site 98-E	46.06	-72.8	14C (carbonate)	37200 ± 2500	41200 ± 4800	Lamothe (1985)
UQ-312	Pierreville site 98-E	46.06	-72.8	14C (carbonate)	34000 ± +1880, -1470	38200 ± 3700	Lamothe et al. (1983)
UQ-494	Pierreville site 98-E	46.06	-72.8	14C (carbonate)	38400 ± +3000, -2400	42300 ± 5850	Lamothe et al. (1983)
UQ-698	Pierreville site 96-A	46.07	-72.82	14C (carbonate)	33600 ± 2300	37800 ± 4450	Lamothe (1985)
UQ-406	Pierreville site 96-A	46.07	-72.82	14C (carbonate)	34000 ± 1050	38300 ± 2450	Lamothe (1985)
M011_quartz	Weybridge Cave Sediments	44.06	-73.21	luminescence (OSL)		36100 ± 6600	Munroe et al. (2016)
M011_feldspar	Weybridge Cave Sediments	44.06	-73.21	luminescence (OSL)		32500 ± 5700	Munroe et al. (2016)
M016_quartz	Weybridge Cave Sediments	44.06	-73.21	luminescence (OSL)		51800 ± 14700	Munroe et al. (2016)
M016_feldspar	Weybridge Cave Sediments	44.06	-73.21	luminescence (OSL)		56700 ± 16000	Munroe et al. (2016)
TO-492	Disraeli Fiord	82.6	-73.22	14C (other organic material)	31360 ± 400	35300 ± 800	Lemmen (1989)
UCI-75737	Pingualuit Crater	61.28	-73.66	14C AMS (organic-rich sediment)	24570 ± 170	28600 ± 400	Guyard et al. (2011)
UCI-76679	Pingualuit Crater	61.28	-73.66	14C AMS (organic-rich sediment)	26870 ± 220	31000 ± 300	Guyard et al. (2011)
Beta-275125	Pingualuit Crater	61.28	-73.66	14C AMS (organic-rich sediment)	27760 ± 210	31500 ± 500	Guyard et al. (2011)
UCI-75731	Pingualuit Crater	61.28	-73.66	14C AMS (organic-rich sediment)	29310 ± 330	33500 ± 750	Guyard et al. (2011)
UCI-75736	Pingualuit Crater	61.28	-73.66	14C AMS (organic-rich sediment)	29550 ± 270	33700 ± 550	Guyard et al. (2011)
Beta-275124	Pingualuit Crater	61.28	-73.66	14C AMS (organic-rich sediment)	30060 ± 260	34100 ± 450	Guyard et al. (2011)
UCI-75732	Pingualuit Crater	61.28	-73.66	14C AMS (organic-rich sediment)	31080 ± 420	35000 ± 850	Guyard et al. (2011)
UCI-77051	Pingualuit Crater	61.28	-73.66	14C AMS (organic-rich sediment)	31200 ± 320	35100 ± 700	Guyard et al. (2011)
TO-4188	Dobbin Bay	79.87	-73.8	14C AMS (carbonate)	43030 ± 660	45900 ± 1300	England (1996)
TO-500	Disraeli Fiord	82.83	-73.82	14C (carbonate)	30850 ± 330	34400 ± 600	Lemmen (1989)
GX-13720	Feachem Lake 3	71.92	-74.4	14C (carbonate)	45600 ± +4100, -2700	46800 ± 4100†	Andrews et al. (1989)
Beta-111702	Bache Peninsula	79.02	-74.57	14C AMS (carbonate)	36980 ± 530	41100 ± 1000	England et al. (2000)
QL-1087	Filtaway Lake	70.47	-74.78	14C Conv. (peat)	47500 ± +1000, -1200	47500 ± 1200*	Miller (1979)
QL-1086	Filtaway Lake	70.47	-74.78	14C Conv. (peat)	48700 ± +1400, -1000	48700 ± 1400*	Miller (1979)
TO-4196	Franklin Pierce Nay	79.4	-74.83	14C AMS (carbonate)	27680 ± 510	31300 ± 1100	England (1996)
GSC-5663	Dobbin Bay	79.78	-74.9	14C Conv. (carbonate)	31810 ± 900	35400 ± 2000	England (1996); McNeely (2006)
GSC-3897	MacMillan Glacier	78.54	-75.34	14C Conv. (carbonate)	25700 ± 890	29400 ± 1600	Blake (1987)
Beta-119909	Koldewey Point	79.1	-75.73	14C AMS (carbonate)	38480 ± 760	42300 ± 1150	England et al. (2000)
GSC-4310	Cadogan Inlet	78.23	-75.78	14C Conv. (carbonate)	31600 ± 1120	35200 ± 2550	Blake (1988)
TO-5593	Cook Peninsula	79.52	-76.27	14C AMS (carbonate)	39470 ± 550	42900 ± 900	England et al. (2000)
Beta-119910	Cook Peninsula	79.43	-76.27	14C AMS (carbonate)	43510 ± 910	46400 ± 1850	England et al. (2000)
TO-5614	Copes Bay	79.5	-76.28	14C AMS (carbonate)	37350 ± 460	41500 ± 850	England et al. (2000)
TO-5611	Cook Peninsula	79.53	-76.32	14C AMS (carbonate)	34210 ± 410	38200 ± 1150	England et al. (2000)
Y-1401	Sixmile Creek	42.43	-76.49	14C Conv. (wood)	41900 ± 900	45300 ± 1700	Bloom (1972)
WW-8529	Sixmile Creek	42.43	-76.49	14C (plants, seeds)	37200 ± 500	41700 ± 850	Karig and Miller (2013)
WW-9396	Sixmile Creek	42.43	-76.49	14C (plants, seeds)	40100 ± 630	43700 ± 1050	Karig and Miller (2013)
WW-8289	Sixmile Creek	42.43	-76.49	14C (plants, seeds)	42300 ± 1500	45700 ± 2850	Karig and Miller (2013)
OS-98037	Sixmile Creek	42.43	-76.49	14C (plants, seeds)	43800 ± 4900	45800 ± 5600†	Karig and Miller (2013)
CAMS-45920	Sixmile Creek	42.43	-76.49	14C AMS (insect)	34510 ± 960	38900 ± 2300	Karig and Miller (2013)
Beta-100442	Sixmile Creek	42.43	-76.49	14C AMS (plants, seeds)	33950 ± 220	38500 ± 600	Karig and Miller (2013)
Beta-100443	Sixmile Creek	42.43	-76.49	14C AMS (plants, seeds)	35190 ± 240	39800 ± 650	Karig and Miller (2013)
AA-94456	Sixmile Creek	42.43	-76.49	14C AMS (plants, seeds)	38350 ± 980	42500 ± 1650	Karig and Miller (2013)
CAMS-45918	Sixmile Creek	42.43	-76.49	14C AMS (plants, seeds)	38790 ± 930	42800 ± 1450	Karig and Miller (2013)
CAMS-45917	Sixmile Creek	42.43	-76.49	14C AMS (plants, seeds)	41000 ± 1900	44600 ± 3350	Karig and Miller (2013)
CAMS-45919	Sixmile Creek	42.43	-76.49	14C AMS (plants, seeds)	43000 ± 1600	46400 ± 2950	Karig and Miller (2013)
Beta-27680	Sixmile Creek	42.43	-76.49	14C AMS (plants, seeds)	27000 ± 360	31000 ± 550	Miller (1996)
Beta-32973	Sixmile Creek	42.43	-76.49	14C AMS (wood)	33900 ± 710	38200 ± 1750	Miller (1996)
TO-5607	Thorvald Peninsula	79.02	-76.55	14C AMS (carbonate)	32450 ± 310	35900 ± 700	England et al. (2000)
Beta-119911	Knud Peninsula	79.15	-76.92	14C AMS (carbonate)	33720 ± 400	37500 ± 1050	England et al. (2000)
GSC-528	Fellside Lake	70.05	-77.5	14C Conv. (carbonate)	30320 ± 820	33900 ± 1800	Lowdon et al., (1967)
AA-8639	Genesee Valley	42.95	-77.74	14C AMS (bone, antler, tooth, tusk)	30285 ± 480	34300 ± 850	Young and Burr (2006)
AA-33146 (2)	Genesee Valley	42.95	-77.74	14C AMS (bone, antler, tooth, tusk)	38000 ± 2900	41900 ± 5650	Young and Burr (2006)
AA-33146 (1)	Genesee Valley	42.95	-77.74	14C AMS (bone, antler, tooth, tusk)	38490 ± 2600	42400 ± 5100	Young and Burr (2006)
CAMS-14611	Genesee Valley	42.95	-77.74	14C AMS (bone, antler, tooth, tusk)	45800 ± 2800	47800 ± 2900†	Young and Burr (2006)
AA-34316	Genesee Valley	42.95	-77.74	14C AMS (carbonate)	40000 ± 1200	43700 ± 1850	Young and Burr (2006)
AA-8640	Genesee Valley	42.95	-77.74	14C AMS (organic-rich sediment)	26680 ± 300	30900 ± 500	Young and Burr (2006)
AA-57447	Genesee Valley	42.95	-77.74	14C AMS (organic-rich sediment)	27680 ± 320	31500 ± 700	Young and Burr (2006)
AA-57450	Genesee Valley	42.95	-77.74	14C AMS (organic-rich sediment)	28350 ± 300	32300 ± 850	Young and Burr (2006)
AA-57448	Genesee Valley	42.95	-77.74	14C AMS (organic-rich sediment)	30140 ± 380	34200 ± 650	Young and Burr (2006)
AA-34317	Genesee Valley	42.95	-77.74	14C AMS (organic-rich sediment)	31100 ± 1000	35100 ± 2250	Young and Burr (2006)
AA-10790	Genesee Valley	42.95	-77.74	14C AMS (organic-rich sediment)	33950 ± 650	38300 ± 1650	Young and Burr (2006)
AA-57446	Genesee Valley	42.95	-77.74	14C AMS (organic-rich sediment)	34260 ± 590	38700 ± 1550	Young and Burr (2006)
AA-10792	Genesee Valley	42.95	-77.74	14C AMS (organic-rich sediment)	35000 ± 740	39500 ± 1700	Young and Burr (2006)
AA-10791	Genesee Valley	42.95	-77.74	14C AMS (organic-rich sediment)	35350 ± 770	39900 ± 1600	Young and Burr (2006)
AA-34108	Genesee Valley	42.95	-77.74	14C AMS (organic-rich sediment)	40100 ± 1300	43800 ± 2050	Young and Burr (2006)
AA-12126	Genesee Valley	42.95	-77.74	14C AMS (organic-rich sediment)	43700 ± 2100	46900 ± 3100†	Young and Burr (2006)
AA-8638	Genesee Valley	42.95	-77.74	14C AMS (peat)	38400 ± 1200	42500 ± 2050	Young and Burr (2006)
AA-57453	Genesee Valley	42.95	-77.74	14C AMS (plants, seeds)	33080 ± 570	37300 ± 1350	Young and Burr (2006)
AA-34103	Genesee Valley	42.95	-77.74	14C AMS (plants, seeds)	39100 ± 1200	43000 ± 1950	Young and Burr (2006)
AA-34397	Genesee Valley	42.95	-77.74	14C AMS (plants, seeds)	39000 ± 1100	43000 ± 1750	Young and Burr (2006)
AA-34104	Genesee Valley	42.95	-77.74	14C AMS (plants, seeds)	40400 ± 1200	44000 ± 1900	Young and Burr (2006)
AA-60195	Genesee Valley	42.95	-77.74	14C AMS (plants, seeds)	40300 ± 1300	44000 ± 2050	Young and Burr (2006)
AA-60173	Genesee Valley	42.95	-77.74	14C AMS (plants, seeds)	40600 ± 1400	44200 ± 2300	Young and Burr (2006)
AA-34099	Genesee Valley	42.95	-77.74	14C AMS (plants, seeds)	41100 ± 3300	44700 ± 5200†	Young and Burr (2006)
AA-60179	Genesee Valley	42.95	-77.74	14C AMS (plants, seeds)	41600 ± 1500	45100 ± 2700	Young and Burr (2006)
AA-60188	Genesee Valley	42.95	-77.74	14C AMS (plants, seeds)	43100 ± 1800	46500 ± 3100	Young and Burr (2006)
AA-60178	Genesee Valley	42.95	-77.74	14C AMS (plants, seeds)	43600 ± 1400	47000 ± 2600	Young and Burr (2006)
AA-42062	Genesee Valley	42.95	-77.74	14C AMS (plants, seeds)	45600 ± 2500	47900 ± 2700†	Young and Burr (2006)
AA-34097	Genesee Valley	42.95	-77.74	14C AMS (plants, seeds)	48500 ± 3500	48500 ± 3500*	Young and Burr (2006)
AA-34102	Genesee Valley	42.95	-77.74	14C AMS (wood)	36600 ± 910	41100 ± 1650	Young and Burr (2006)
AA-60185	Genesee Valley	42.95	-77.74	14C AMS (wood)	39200 ± 1100	43100 ± 1750	Young and Burr (2006)
AA-60176	Genesee Valley	42.95	-77.74	14C AMS (wood)	39400 ± 1200	43300 ± 1900	Young and Burr (2006)
AA-30220	Genesee Valley	42.95	-77.74	14C AMS (wood)	39900 ± 1200	43700 ± 1850	Young and Burr (2006)
AA-34106	Genesee Valley	42.95	-77.74	14C AMS (wood)	40300 ± 1200	44000 ± 1900	Young and Burr (2006)
AA-60192	Genesee Valley	42.95	-77.74	14C AMS (wood)	40500 ± 1300	44100 ± 2100	Young and Burr (2006)
AA-30219	Genesee Valley	42.95	-77.74	14C AMS (wood)	41100 ± 1500	44600 ± 2600	Young and Burr (2006)
AA-34318	Genesee Valley	42.95	-77.74	14C AMS (wood)	41000 ± 1900	44600 ± 3350	Young and Burr (2006)
AA-60190	Genesee Valley	42.95	-77.74	14C AMS (wood)	41600 ± 1600	45100 ± 2900	Young and Burr (2006)
AA-57454	Genesee Valley	42.95	-77.74	14C AMS (wood)	42100 ± 1600	45500 ± 2950	Young and Burr (2006)
AA-34105	Genesee Valley	42.95	-77.74	14C AMS (wood)	42100 ± 1700	45600 ± 3100	Young and Burr (2006)
AA-60174	Genesee Valley	42.95	-77.74	14C AMS (wood)	43000 ± 1700	46400 ± 3050	Young and Burr (2006)
AA-60172	Genesee Valley	42.95	-77.74	14C AMS (wood)	46500 ± 2800	46500 ± 2800*	Young and Burr (2006)
AA-60187	Genesee Valley	42.95	-77.74	14C AMS (wood)	46600 ± 2700	46600 ± 2700*	Young and Burr (2006)
AA-60194	Genesee Valley	42.95	-77.74	14C AMS (wood)	43200 ± 1800	46600 ± 3100	Young and Burr (2006)
AA-60189	Genesee Valley	42.95	-77.74	14C AMS (wood)	43500 ± 1900	46800 ± 3050†	Young and Burr (2006)
AA-60180	Genesee Valley	42.95	-77.74	14C AMS (wood)	43800 ± 1900	47100 ± 2900†	Young and Burr (2006)
AA-60183	Genesee Valley	42.95	-77.74	14C AMS (wood)	43900 ± 2000	47100 ± 2950†	Young and Burr (2006)
AA-60186	Genesee Valley	42.95	-77.74	14C AMS (wood)	47200 ± 3000	47200 ± 3000*	Young and Burr (2006)
AA-34107	Genesee Valley	42.95	-77.74	14C AMS (wood)	47300 ± 2900	47300 ± 2900*	Young and Burr (2006)
AA-60181	Genesee Valley	42.95	-77.74	14C AMS (wood)	44400 ± 2200	47400 ± 2900†	Young and Burr (2006)
AA-60184	Genesee Valley	42.95	-77.74	14C AMS (wood)	44400 ± 2200	47400 ± 2900†	Young and Burr (2006)
AA-60191	Genesee Valley	42.95	-77.74	14C AMS (wood)	47600 ± 3000	47600 ± 3000*	Young and Burr (2006)
AA-14584	Genesee Valley	42.95	-77.74	14C AMS (wood)	46337 ± 2982	47900 ± 2900†	Young and Burr (2006)
AA-34098	Genesee Valley	42.95	-77.74	14C AMS (wood)	46000 ± 2700	47900 ± 2750†	Young and Burr (2006)
AA-57452	Genesee Valley	42.95	-77.74	14C AMS (wood)	45900 ± 2500	48000 ± 2650†	Young and Burr (2006)
AA-60193	Genesee Valley	42.95	-77.74	14C AMS (wood)	46400 ± 2700	48000 ± 2650†	Young and Burr (2006)
AA-42063	18km SW of Elam-DeWitt site	42.81	-77.86	14C AMS (wood)	43300 ± 1800	46700 ± 3050	unpublished age; mentioned in Young and Burr (2006)
GSC-1964	Pond Inlet airstrip	72.68	-78	14C Conv. (carbonate)	33300 ± 800	37100 ± 1850	Lowdon and Blake (1975)
GSC-1153	Pond Inlet	72.68	-78	14C Conv. (carbonate)	33100 ± 900	36900 ± 2000	Lowdon et al. (1971)
AA-3254	Nottingham Island (North shore)	63.45	-78.03	14C AMS (carbonate)	44200 ± 2300	46900 ± 3200†	Kaufman and Williams (1992); Laymon (1991)
GSC-1055	Cape Norton Shaw	76.53	-78.37	14C Conv. (carbonate)	33900 ± 1360	37700 ± 2950	Blake (1987)
QL-134	Cowanda hospital interstadial site	42.49	-78.93	14C Conv. (wood)	47200 ± 800	47200 ± 800*	Calkin et al. (1982)
QL-133	Cowanda hospital interstadial site	42.49	-78.93	14C Conv. (wood)	51600 ± 1900	51600 ± 1900*	Calkin et al. (1982)
GSC-1536-2	Coburg Island Series	75.88	-79.03	14C Conv. (carbonate)	25500 ± 1700	29200 ± 3400	Blake (1988)
GSC-1098	Coburg Island Series	75.88	-79.03	14C Conv. (carbonate)	33600 ± 700	37400 ± 1650	Blake (1988)
GSC-1536 (outer)	Coburg Island Series	75.88	-79.03	14C Conv. (carbonate)	38200 ± 1400	42000 ± 2500	Blake (1988)
GSC-1536 (inner)	Coburg Island Series	75.88	-79.03	14C Conv. (carbonate)	39500 ± 1300	43100 ± 2100	Blake (1988)
GSC-1926 (outer)	Coburg Island Series	75.88	-79.03	14C Conv. (carbonate)	41100 ± 600	44200 ± 1100	Blake (1988)
GSC-1926 (inner)	Coburg Island Series	75.88	-79.03	14C Conv. (carbonate)	43700 ± 800	46600 ± 1650	Blake (1988)
GSC-1617 (inner)	Coburg Island Series	75.88	-79.03	14C Conv. (carbonate)	46400 ± 2000	48300 ± 2200†	Blake (1988)
SPSD84-1	Sylvan Park	43.73	-79.21	luminescence (TL)		41200 ± 8000	Berger and Eyles (1994)
SPSF87-2	Sylvan Park	43.73	-79.21	luminescence (TL)		50900 ± 8800	Berger and Eyles (1994)
U. Thorncliffe	Scarborough Bluffs	43.71	-79.23	luminescence (TL)		35900 ± 5400	Berger (1984)
CPSF87-1	Cudia Park	43.72	-79.23	luminescence (TL)		55500 ± 9800	Berger and Eyles (1994)
GSC-271	Cudia Park	43.72	-79.23	14C Conv. (peat)	38000 ± 1300	42200 ± 2300	Dyck et al. (1966); Berti (1975)
GSC-1082	Hi Section	43.71	-79.23	14C Conv. (organic-rich sediment)	28300 ± 600	32300 ± 1250	Lowdon et al. (1971)
GSC-534	Cudia Park	43.72	-79.23	14C Conv. (peat)	48800 ± 1400	48800 ± 1400*	Lowdon et al. (1971)
GSC-1221	Sunnypoint section	43.72	-79.23	14C Conv. (plants, seeds)	32000 ± 690	36000 ± 1650	Lowdon et al. (1971)
GrN-4817	Scarborough 2	43.71	-79.24	14C Conv. (wood)	54340 ± 500	54300 ± 500*	Vogel and Waterbolk (1972)
GrN-4454	Markham	43.83	-79.35	14C Conv. (peat)	24600 ± 190	28600 ± 450	Vogel and Waterbolk (1972)
DVSF-10b	Don Valley Brickyard	43.69	-79.36	luminescence (TL)		54100 ± 8200	Berger and Eyles (1994)
DVSF-10a	Don Valley Brickyard	43.69	-79.36	luminescence (TL)		59800 ± 8500	Berger and Eyles (1994)
L-409 wood cellulose	Don Valley Brickyard	43.68	-79.36	14C (wood)	40200 ± 1600	43900 ± 2650	Olson and Broecker (1959)
L-409 untreated wood	Don Valley Brickyard	43.68	-79.36	14C (wood)	43100 ± 3000	46300 ± 3900†	Olson and Broecker (1959)
WCSD	Woodbridge	43.76	-79.59	luminescence (TL)		45900 ± 9000	Berger and Eyles (1994)
GSC-1181	Woodbridge pit	43.76	-79.59	14C Conv. (organic-rich sediment)	45000 ± 900	48300 ± 1700†	Lowdon et al. (1971)
GSC-629-2	Woodbridge	43.76	-79.59	14C Conv. (peat)	40200 ± 480	43800 ± 850	Lowdon et al. (1971)
CAMS-20895	Titusville	41.62	-79.64	14C AMS (insect)	38900 ± 3200	42800 ± 6150	Cong et al. (1996)
CAMS-20185	Titusville	41.62	-79.64	14C AMS (wood)	39070 ± 960	43000 ± 1500	Cong et al. (1996)
I-1845	Titusville	41.62	-79.64	14C (peat)	39900 ± 4900	43200 ± 7400†	Vogel and Waterbolk (1972)
GrN-4996	Titusville	41.62	-79.64	14C Conv. (peat)	40500 ± 1000	44100 ± 1600	Vogel and Waterbolk (1972)
"Gulf Research"	Lake Erie	42.26	-79.92	14C Conv. (organic-rich sediment)	27600 ± +3000, -2500	31700 ± 6200	Dreimanis (1966)
GSC-184	Navy Board Inlet	72.88	-80.77	14C Conv. (carbonate)	34200 ± +3400, -2400	37900 ± 6400	Dyck et al. (1965)
GSC-4837	NE of Timmins	48.57	-80.8	14C Conv. (wood)	39100 ± 1470	43100 ± 2450	McNeely and Jorgensen (1993)
TO-13126	Zorra Quarry	43.1	-80.9	14C AMS (wood)	42900 ± 1050	46200 ± 2150	Bajc et al. (2015)
TO-13125R	Zorra Quarry	43.1	-80.9	14C AMS (wood)	47220 ± 1050	47200 ± 1050*	Bajc et al. (2015)
TO-13126RR	Zorra Quarry	43.1	-80.9	14C AMS (wood)	47640 ± 680	47600 ± 700*	Bajc et al. (2015)
A3030	Zorra Quarry	43.1	-80.9	14C AMS (wood)	44900 ± 1500	48000 ± 2150†	Bajc et al. (2015)
TO-13125	Zorra Quarry	43.1	-80.9	14C AMS (wood)	45160 ± 1260	48300 ± 1900†	Bajc et al. (2015)
TO-13126R	Zorra Quarry	43.1	-80.9	14C AMS (wood)	50520 ± 1570	50500 ± 1600*	Bajc et al. (2015)
GSC-1027	Ellice Bog	43.48	-80.94	14C Conv. (organic-rich sediment)	33900 ± 1250	38200 ± 2800	McNeely (1989)
GSC-4491 HP	Timmins	48.65	-81.12	14C Conv. (organic-rich sediment)	41400 ± 720	44800 ± 1300	McNeely and McCuaig (1991)
GrN-4272	St Thomas	42.75	-81.18	14C Conv. (peat)	38000 ± 1500	42100 ± 2700	Dreimanis (1966); Vogel and Waterbolk (1972)
GrN-4238	St Thomas	42.75	-81.18	14C Conv. (peat)	34000 ± 500	38400 ± 1400	Dreimanis 1966; Vogel and Waterbolk (1972)
Gro-2570	Port Talbot	42.62	-81.38	14C Conv. (organic-rich sediment)	47000 ± 2500	47000 ± 2500*	deVries and Dreimanis (1960)
Gro-2597	Port Talbot	42.62	-81.38	14C Conv. (organic-rich sediment)	47500 ± 250	47500 ± 250*	deVries and Dreimanis (1960)
Gro-2580	Port Talbot	42.62	-81.38	14C Conv. (wood)	44200 ± 1500	47500 ± 2450†	deVries and Dreimanis (1960)
GrN-2570	Port Talbot	42.62	-81.38	14C Conv. (organic-rich sediment)	46700 ± 1400	46700 ± 1400*	Dreimanis 1966; Vogel and Waterbolk (1972)
GrN-2601	Port Talbot	42.62	-81.38	14C Conv. (organic-rich sediment)	47600 ± 400	47600 ± 400*	Dreimanis 1966; Vogel and Waterbolk (1972)
GrN-2619	Port Talbot	42.62	-81.38	14C Conv. (peat)	45100 ± 1000	48300 ± 1750†	Dreimanis 1966; Vogel and Waterbolk (1972)
GrN-2580	Port Talbot	42.62	-81.38	14C Conv. (wood)	44400 ± 1200	47700 ± 2150	Dreimanis 1966; Vogel and Waterbolk (1972)
GSC-217	Port Talbot	42.63	-81.38	14C Conv. (wood)	47700 ± 1200	47700 ± 1200*	Dyck et al. (1965); Dreimanis (1966)
GSC-2353-2	Port Talbot	42.62	-81.38	14C Conv. (wood)	45200 ± 630	48600 ± 1400	Lowdon and Blake (1978)
GSC-5042HP	Waite Farm	42.62	-81.38	14C Conv. (wood)	40200 ± 450	43800 ± 850	McNeely and Jorgensen (1993)
L-370A untreated	Port Talbot	42.63	-81.38	14C (organic-rich sediment)	33000 ± 1500	37200 ± 3200	Olson and Broecker (1959)
GrN-4397	Port Talbot	42.62	-81.38	14C Conv. (plants, seeds)	33400 ± 500	37600 ± 1250	Vogel and Waterbolk (1972)
GrN-4799	Port Talbot	42.62	-81.38	14C Conv. (plants, seeds)	42700 ± 1200	46100 ± 2400	Vogel and Waterbolk (1972)
GrN-4800	Port Talbot	42.62	-81.38	14C Conv. (plants, seeds)	43400 ± 1300	46800 ± 2550	Vogel and Waterbolk (1972)
GSC-2126	Plum Point	42.61	-81.39	14C Conv. (wood)	28000 ± 370	31900 ± 850	Lowdon et al. (1977)
L-217B	Plum Point	42.6	-81.4	14C (wood)	24600 ± 1600	28800 ± 3100	Dreimanis (1966)
L-185B	Plum Point	42.6	-81.4	14C (wood)	28200 ± 1500	32300 ± 2950	Dreimanis (1966)
GrN-4427	Plum Point test hole	42.6	-81.4	14C Conv. (peat)	45800 ± 1200	48700 ± 1650†	Dreimanis (1966)
GrN-2625	Plum Point	42.6	-81.4	14C Conv. (wood)	27470 ± 130	31300 ± 250	Dreimanis (1966)
W-177	Plum Point	42.6	-81.4	14C Conv. (wood)	27500 ± 1200	31600 ± 2450	Dreimanis (1966)
GSC-993-2	Plum Point	42.6	-81.4	14C Conv. (peat)	46400 ± 940	49200 ± 1150†	Lowdon and Blake (1970)
GrN-4429	Plum Point	42.6	-81.4	14C Conv. (organic-rich sediment)	45800 ± 1200	48700 ± 1650†	Vogel and Waterbolk (1972)
OS-67639	South Fraserdale Lake	49.77	-81.52	14C (wood)	42240 ± 370	45500 ± 700	Stroup et al. (2013)
OS-67637	South Fraserdale Lake	49.77	-81.52	14C (wood)	45702 ± 942	48800 ± 1450†	Stroup et al. (2013)
GSC-4635	Canon Fiord	80.2	-81.61	14C Conv. (other organic material)	38200 ± 1510	42300 ± 2650	England (1990); McNeely and Jorgensen (1992)
TO-1198	South Bay	79.55	-81.8	14C AMS (carbonate)	29380 ± 230	33200 ± 650	Sloan (1990)
TO-1201	South Bay	79.55	-81.8	14C AMS (carbonate)	34950 ± 340	39100 ± 750	Sloan (1990)
TO-1200	South Bay	79.55	-81.8	14C AMS (carbonate)	38100 ± 380	42000 ± 550	Sloan (1990)
GSC-134	Swinnerton Pinensula	77.29	-81.81	14C Conv. (carbonate)	29800 ± 220	33600 ± 500	Dyck and Fyles (1964)
TO-449	Outer Greely	80.6	-81.92	14C (plants, seeds)	33300 ± 700	37500 ± 1650	England (1990)
TO-1283	Outer Greely	80.37	-81.93	14C (carbonate)	38070 ± 410	42000 ± 600	England (1990)
TO-113	Makinson Inlet	77.23	-81.94	14C AMS (wood)	41260 ± 400	44700 ± 800	Blake (1993)
TO-191	Webber Glacier	80.88	-82.25	14C AMS (wood)	46460 ± 520	46500 ± 550*	Blake (1987)
GSC-3427	Webber Glacier	80.88	-82.25	14C Conv. (wood)	38200 ± 1240	42300 ± 2150	Blake (1987)
QL-1215	Mill Creek	43.02	-82.58	14C Conv. (wood)	48300 ± 800	48300 ± 800*	Eschman (1980)
unknown (not given	Port Huron	43.05	-82.61	luminescence (TL)		57000 ± 9000	Karrow et al. (1997)
GX-3447	North of Avoca	43.08	-82.68	14C Conv. (peat)	36200 ± 4400	40000 ± 8250	Eschman (1980)
TO-1284	Outer Canon	80.17	-82.83	14C (carbonate)	38010 ± 410	42000 ± 600	England (1990)
GrN-3219	Rocky Fork	40.02	-82.85	14C Conv. (wood)	46600 ± 2200	46600 ± 2200*	Vogel and Waterbolk (1972)
TO-5152	Croker Bay	74.61	-83.63	14C AMS (carbonate)	23830 ± 250	27600 ± 400	Dyke (1999)
TO-5153	Croker Bay	74.61	-83.63	14C AMS (carbonate)	25410 ± 510	29100 ± 1200	Dyke (1999)
TO-4879	Croker Bay	74.61	-83.63	14C AMS (carbonate)	27240 ± 270	31000 ± 400	Dyke (1999)
GSC-5848	Croker Bay	74.61	-83.63	14C Conv. (carbonate)	23200 ± 270	27100 ± 600	Dyke (1999)
I-1733	South side of Wolf Hill	75.6	-84.5	14C Conv. (carbonate)	30100 ± 1500	33700 ± 3050	Barr (1971)
I-1734	South side of Cape Skogn	75.6	-84.5	14C Conv. (carbonate)	31200 ± 1800	34900 ± 3800	Barr (1971)
AA-23605	Bay Fiord	78.85	-84.53	14C AMS (carbonate)	27790 ± 360	31300 ± 650	Ó'Cofaigh et al. (2000)
AA-23606	Bay Fiord	78.85	-84.53	14C AMS (carbonate)	38320 ± 960	42100 ± 1600	Ó'Cofaigh et al. (2000)
AA-23602	Bay Fiord	78.85	-84.55	14C AMS (carbonate)	31340 ± 420	34900 ± 850	Ó'Cofaigh et al. (2000)
AA-23601	Bay Fiord	78.85	-84.55	14C AMS (carbonate)	35240 ± 850	39300 ± 2050	Ó'Cofaigh et al. (2000)
AA-23603	Bay Fiord	78.85	-84.55	14C AMS (carbonate)	35920 ± 730	40100 ± 1500	Ó'Cofaigh et al. (2000)
AA-23604	Bay Fiord	78.85	-84.55	14C AMS (carbonate)	42100 ± 1700	45200 ± 3050	Ó'Cofaigh et al. (2000)
PITT-0928	Glendale daycare center	39.5	-84.57	14C Conv. (wood)	35550 ± 880	40100 ± 1750	Lowell (1995)
PITT-0929	Glendale daycare center	39.5	-84.57	14C Conv. (wood)	39830 ± 1450	43600 ± 2350	Lowell (1995)
ISGS-726	Bentas Fork #1	39.75	-84.58	14C (organic-rich sediment)	44800 ± 1700	47800 ± 2350†	Liu et al. (1986)
GSC-51	Fosheim Peninsula	79.82	-84.61	14C Conv. (carbonate)	28700 ± 600	32300 ± 1250	Dyck and Fyles (1962)
TO-2242	Black Top Ridge	80.25	-84.65	14C AMS (wood)	44420 ± 840	47700 ± 1800	Bell (1992, 1996)
GSC-3364	Glacier 7A-45 series (III)	77.83	-84.75	14C Conv. (wood)	31100 ± 480	35000 ± 950	Blake (1988)
GSC-2687	Glacier 7A-45 series (III)	77.83	-84.75	14C Conv. (wood)	32500 ± 1580	36700 ± 3350	Blake (1988)
GSC-188	Tablerotit Hill	71.75	-84.75	14C Conv. (carbonate)	35400 ± +2100, -1600	39200 ± 4000	Dyck et al (1965)
AA-23608	Bay Fiord	78.9	-85	14C AMS (carbonate)	33440 ± 610	37200 ± 1450	Ó'Cofaigh et al. (2000)
AA-23607	Bay Fiord	78.9	-85	14C AMS (carbonate)	37540 ± 1000	41500 ± 1700	Ó'Cofaigh et al. (2000)
AA-23609	Bay Fiord	78.9	-85	14C AMS (carbonate)	38900 ± 1100	42600 ± 1850	Ó'Cofaigh et al. (2000)
Beta-9273	Kalkasa	44.73	-85.24	14C (wood)	36300 ± 2450	40400 ± 4650	Winters et al. (1986, 1988); Winters and Rieck (1991)
Beta-9046	Kalkasa	44.73	-85.24	14C (wood)	34200 ± 1320	38500 ± 2900	Winters et al. (1986, 1988); Winters and Rieck (1991)
GSC-5214	Sunday Bay	71.84	-85.38	14C Conv. (carbonate)	30400 ± 660	34100 ± 1400	McNeely and Atkinson (1995)
TO-480	Cape Alfred Ernest	82.38	-85.58	14C AMS (carbonate)	32111 ± 370	35600 ± 750	Evans and Mott (1993)
TO-485	Cape Alfred Ernest	82.38	-85.58	14C AMS (peat)	39270 ± 640	43100 ± 1050	Evans and Mott (1993); McNeely and Jorgensen (1992)
I-5079	GR-4	42.89	-85.65	14C Conv. (plants, seeds)	28800 ± 1050	32800 ± 1900	Buckley and Willis (1972)
I-5078	Grand Rapids	43.02	-85.67	14C Conv. (wood)	33300 ± 1800	37500 ± 3650	Buckley and Willis (1972); Eschman (1980)
W-3823	Hi5	43.04	-85.68	14C Conv. (wood)	39500 ± 1000	43300 ± 1550	Rieck and Winters (1980)
GSC-2700	West of Gunnars Island / Bjorne Peninsula	77.48	-85.75	14C Conv. (carbonate)	30100 ± 750	33700 ± 1650	Hodgson (1985); Blake (1986); Ó'Cofaigh et al. (2000)
QL-963	Pine River	44.23	-85.88	14C Conv. (wood)	45800 ± 700	49100 ± 1150†	Stuiver et al. (1978)
GX-27991	well near to VB-01-09	42.25	-85.98	14C (wood)	38390 ± +2290, -1780	42400 ± 4400	Kehew et al. (2005)
GX-28748	VB-01-09	42.26	-86.06	14C (wood)	32480 ± 1850	36700 ± 3950	Kehew et al. (2005)
GX-27990	R15W	42.26	-86.1	14C (wood)	30720 ± +2370, -1830	34900 ± 4950	Kehew et al. (2005)
Beta-329000	Hemlock Crossing	42.87	-86.2	14C AMS (wood)	37840 ± 400	42100 ± 600	Colgan et al. (2015)
Beta-353120	Hemlock Crossing	42.87	-86.2	14C AMS (wood)	40790 ± 400	44300 ± 800	Colgan et al. (2015)
Keck-122338	Repulse Bay	66.17	-86.21	14C AMS (carbonate)	32290 ± 210	35800 ± 500	McMartin et al. (2015)
Beta-339717	Repulse Bay	66.16	-86.21	14C AMS (carbonate)	36590 ± 350	40800 ± 750	McMartin et al. (2015)
Keck-122480	Repulse Bay	66.16	-86.21	14C AMS (carbonate)	36950 ± 590	41100 ± 1100	McMartin et al. (2015)
Beta-339718	Repulse Bay	66.17	-86.21	14C AMS (carbonate)	39450 ± 460	42900 ± 750	McMartin et al. (2015)
Beta-315076	Repulse Bay	66.16	-86.21	14C AMS (carbonate)	39820 ± 460	43200 ± 800	McMartin et al. (2015)
Beta-339713	Repulse Bay	66.19	-86.22	14C AMS (carbonate)	38000 ± 400	42000 ± 600	McMartin et al. (2015)
Beta-3311	Allegan County	42.59	-86.23	14C Conv. (wood)	37150 ± 540	41600 ± 900	Gephart et al. (1982); Gephart (1983); Monaghan et al. (1986)
Beta-3310	Allegan County	42.59	-86.23	14C Conv. (wood)	38130 ± 740	42300 ± 1100	Gephart et al. (1982); Monaghan et al. (1986)
ISGS-942	Kokomo	40.55	-86.24	14C (organic-rich sediment)	41600 ± 2200	45200 ± 3750	Liu et al. (1986)
Beta-339715	Repulse Bay	66.14	-86.24	14C AMS (carbonate)	38240 ± 410	42100 ± 600	McMartin et al. (2015)
W-108	South Haven	42.38	-86.26	14C Conv. (wood)	30000 ± 800	34000 ± 1800	Eschman (1980)
Beta-339716	Repulse Bay	66.17	-86.26	14C AMS (carbonate)	33950 ± 270	37900 ± 850	McMartin et al. (2015)
AA-23585	Stor Island	78.97	-86.28	14C AMS (carbonate)	47260 ± 2800	47300 ± 2800*	Ó'Cofaigh et al. (2000)
AA-27489	Stor Island	78.97	-86.28	14C AMS (carbonate)	48200 ± 3500	48200 ± 3500*	Ó'Cofaigh et al. (2000)
TO-2228	Iceberg Point lowland	80.25	-86.32	14C AMS (carbonate)	45850 ± 980	48600 ± 1600†	Bell (1992)
Beta-117277	Buchanan Lake	79.34	-86.35	14C AMS (wood)	49790 ± 1800	49800 ± 1800*	McNeely (2006)
GSC-5666	Buchanan Lake	79.34	-86.35	14C Conv. (carbonate)	33400 ± 790	37200 ± 1850	McNeely (2006)
GSC-111	Hare Cape Ridge	79.93	-86.38	14C Conv. (carbonate)	36300 ± 2000	40100 ± 3850	Dyck and Fyles (1964)
TO-667	Otto Fiord	80.63	-86.42	14C AMS (carbonate)	26090 ± 210	29900 ± 650	Bednarski (1995)
S-2650	Otto Fiord	81.08	-87.23	14C (carbonate)	30250 ± 1100	33800 ± 2250	Bednarski (1995)
TO-5602	Bear Corner	78.17	-87.4	14C AMS (carbonate)	35720 ± 400	39900 ± 950	Ó'Cofaigh et al. (2000)
TO-421	Otto Fiord	81.07	-87.42	14C AMS (carbonate)	34800 ± 400	38900 ± 950	Bednarski (1995)
TO-661	Otto Fiord	81.07	-87.42	14C AMS (carbonate)	35020 ± 640	39100 ± 1650	Bednarski (1995)
TO-420	Otto Fiord	81.07	-87.42	14C AMS (carbonate)	38010 ± 590	42000 ± 900	Bednarski (1995)
ISGS-717	Ambia Teays Test	40.49	-87.49	14C (organic-rich sediment)	25450 ± 480	29600 ± 1050	Liu et al. (1986)
GSC-2786 (inner fraction)	Cape Storm series (VII)	76.4	-87.57	14C Conv. (carbonate)	40500 ± 1660	43900 ± 2800	Blake (1987)
GSC-2786 (outer fraction)	Cape Storm series (VII)	76.4	-87.57	14C Conv. (carbonate)	41500 ± 1460	44600 ± 2500	Blake (1987)
GSC-2584-3	Cape Storm series (VII)	76.4	-87.57	14C Conv. (other organic material)	35800 ± 1080	40300 ± 2100	Blake (1987)
GSC-2584-2	Cape Storm series (VII)	76.4	-87.57	14C Conv. (other organic material)	37600 ± 1200	41800 ± 2100	Blake (1987)
GSC-2584	Cape Storm series (VII)	76.4	-87.57	14C Conv. (other organic material)	40300 ± 1550	44000 ± 2550	Blake (1987)
GSC-2229	Cape Storm series IX	76.4	-87.57	14C Conv. (bone, antler, tooth, tusk)	28700 ± 1110	32700 ± 2000	Blake (1988)
TO-2283	Nansen Sound	80.38	-87.6	14C AMS (carbonate)	47020 ± 950	47000 ± 950†	Bednarski (1998)
GSC-829	Andersrag Beach	76.42	-87.6	14C Conv. (carbonate)	39700 ± 1300	43200 ± 2100	Blake (1987)
GSC-1409	Cape Storm series (VIII)	76.39	-87.6	14C Conv. (carbonate)	27700 ± 480	31300 ± 1000	Blake (1988)
GSC-2486	Cape Storm series (VIII)	76.39	-87.6	14C Conv. (carbonate)	31700 ± 540	35200 ± 1050	Blake (1988)
GSC-1880	Cape Storm series (VIII)	76.39	-87.6	14C Conv. (carbonate)	38300 ± 1360	42100 ± 2400	Blake (1988)
GSC-2485 (inner)	Cape Storm series (VIII)	76.39	-87.6	14C Conv. (carbonate)	40500 ± 740	43800 ± 1200	Blake (1988)
GSC-2800	Cape Storm series (VIII)	76.39	-87.6	14C Conv. (carbonate)	40800 ± 1350	44000 ± 2150	Blake (1988)
GSC-2485 (middle)	Cape Storm series (VIII)	76.39	-87.6	14C Conv. (carbonate)	41400 ± 820	44500 ± 1400	Blake (1988)
GSC-2485 (outer)	Cape Storm series (VIII)	76.39	-87.6	14C Conv. (carbonate)	42400 ± 920	45300 ± 1750	Blake (1988)
GSC-2310	Cape Storm series (VIII)	76.39	-87.6	14C Conv. (carbonate)	42500 ± 1900	45600 ± 3350	Blake (1988)
TO-2282	Nansen Sound	80.38	-87.62	14C AMS (carbonate)	45860 ± 840	48700 ± 1450†	Bednarski (1998)
TO-5615	Baumann Fiord	78.15	-87.77	14C AMS (carbonate)	36570 ± 430	40800 ± 900	Ó'Cofaigh et al. (2000)
TO-5600	Baumann Fiord	78.15	-87.77	14C AMS (carbonate)	37320 ± 410	41500 ± 750	Ó'Cofaigh et al. (2000)
TO-663	Otto Fiord	80.73	-87.8	14C AMS (carbonate)	37130 ± 430	41300 ± 800	Bednarski (1995)
ISGS-1023	St Francis power plant	42.97	-87.85	14C (wood)	37800 ± 1100	42000 ± 1900	Liu et al. (1986)
TO-2354	Nansen Sound	80.34	-87.88	14C AMS (carbonate)	37390 ± 430	41500 ± 750	Bednarski (1998)
GrN-4408	Elburn	41.87	-88.42	14C Conv. (wood)	32600 ± 520	36700 ± 1400	Vogel and Waterbolk (1972)
GrN-4468	Elgin	42.05	-88.48	14C Conv. (wood)	41100 ± 1500	44600 ± 2600	Vogel and Waterbolk (1972)
W-638	Lake Geneva	42.55	-88.5	14C Conv. (wood)	31800 ± 1200	35900 ± 2550	Rubin and Alexander (1960)
ISGS-863	Wedron Section	41.43	-88.78	14C (wood)	24370 ± 310	28400 ± 650	Liu et al. (1986)
ISGS-862	Wedron Section	41.43	-88.78	14C (wood)	24900 ± 200	28900 ± 500	Liu et al. (1986)
W-871	Wedron quarry	41.43	-88.78	14C Conv. (wood)	26800 ± 700	30800 ± 1550	Rubin and Alexander (1960)
ISGS-1039	Oak Crest Subdivision	42.33	-88.99	14C (organic-rich sediment)	24830 ± 350	28900 ± 800	Liu et al. (1986)
ISGS-749	Oak Crest Subdivision	42.33	-88.99	14C (organic-rich sediment)	33220 ± 710	37400 ± 1700	Liu et al. (1986)
ISGS-1073	Oak Crest Subdivision	42.33	-88.99	14C (organic-rich sediment)	37900 ± 1300	42100 ± 2300	Liu et al. (1986)
ISGS-1045	Oak Crest Subdivision	42.33	-88.99	14C (organic-rich sediment)	43100 ± 1100	46400 ± 2250	Liu et al. (1986)
ISGS-1069	Oak Crest Subdivision	42.33	-88.99	14C (organic-rich sediment)	43800 ± 2700	46800 ± 3450†	Liu et al. (1986)
ISGS-744	Oak Crest Subdivision	42.33	-88.99	14C (organic-rich sediment)	47400 ± 2400	47400 ± 2400*	Liu et al. (1986)
ISGS-772	Nimitz Quarry Section	42.33	-89	14C (wood)	47400 ± 1500	47400 ± 1500*	Liu et al. (1986)
W-642	Princeton	41.4	-89.47	14C Conv. (wood)	26200 ± 800	30200 ± 1500	Rubin and Alexander (1960)
IGS-256	Schelke Bog	45.28	-89.47	14C Conv. (organic-rich sediment)	40800 ± 2000	44500 ± 3550	Stewart and Mickelson (1976)
GSC-65	White Point	81.12	-90.12	14C Conv. (carbonate)	38600 ± +3700, -2600	42000 ± 6900	Dyck and Fyles (1963)
GSC-6194	Viks Fiord	75.89	-90.24	14C Conv. (carbonate)	39900 ± 1800	43400 ± 3150	Dyke (1999)
GSC-149	NW Ellesmere Island	81.17	-90.25	14C Conv. (carbonate)	37200 ± +4100, -2700	40600 ± 7750	Dyck and Fyles (1964)
GSC-4793	Nansen Sound	80.7	-90.75	14C Conv. (carbonate)	38500 ± 1320	42200 ± 2300	McNeely and Jorgensen (1992); Bednarski (1998)
GSC-2044	Nansen Sound	81.03	-91.63	14C Conv. (carbonate)	28800 ± 1800	32500 ± 3600	Blake (1986)
GSC-123	Fury Beach	72.75	-92.42	14C Conv. (carbonate)	31860 ± +2560, -1940	35700 ± 5200	Dyck and Fyles (1964)
GSC-139	Rens Plain	81.08	-92.42	14C Conv. (carbonate)	36600 ± +3700, -2200	40100 ± 7100	Dyck and Fyles (1964)
W-747	Hammond	44.93	-92.5	14C Conv. (wood)	29000 ± 1000	33000 ± 1850	Rubin and Alexander (1960)
GSC-113	Rens Fiord	81.05	-93.17	14C Conv. (carbonate)	36800 ± +4200, -2800	40200 ± 7950	Dyck and Fyles (1964)
TO-5616	Cormwall Island site 8	77.7	-94.67	14C AMS (carbonate)	31120 ± 350	34600 ± 700	Lamoureux and England (2000)
AA-23577	Cornwall Island site 7	77.75	-94.78	14C AMS (carbonate)	37690 ± 1000	41600 ± 1700	Lamoureux and England (2000)
AA-23580	Cornwall Island site 9	77.67	-94.93	14C AMS (carbonate)	43520 ± 1870	46500 ± 3150	Lamoureux and England (2000)
Beta-111708	Cornwall Island site 10	77.58	-95.18	14C AMS (carbonate)	36230 ± 540	40400 ± 1150	Lamoureux and England (2000)
Beta-111710	Cornwall Island site 11	77.6	-95.87	14C AMS (carbonate)	36160 ± 490	40400 ± 1100	Lamoureux and England (2000)
GSC-4760	Stuartburn	49.16	-96.72	14C Conv. (wood)	35500 ± 870	40000 ± 1750	McNeely and Jorgensen (1992)
GSC-6235	Cockscomb Peak	76.22	-97.6	14C Conv. (carbonate)	28600 ± 660	32200 ± 1300	McNeely (2006)
GSC-3049	Goodsir Inlet	75.67	-97.68	14C Conv. (organic-rich sediment)	38500 ± 1370	42600 ± 2350	Blake (1988)
GSC-378	Markham Point	75.49	-97.82	14C Conv. (carbonate)	33940 ± 1100	37800 ± 2500	Dyck et al. (1966)
GSC-166	Goodsir Inlet	75.73	-98.15	14C Conv. (carbonate)	25000 ± 500	28700 ± 1050	Dyck et al. (1965)
GSC-212_outer	Dartmouth Bight	75.64	-99.33	14C Conv. (carbonate)	33100 ± +1300, -1100	36900 ± 2800	Dyck et al. (1965)
GSC-212_inner	Dartmouth Bight	75.64	-99.33	14C Conv. (carbonate)	35900 ± +1400, -1200	39900 ± 2850	Dyck et al. (1965)
TO-4639	Turtle Mountain	49.1	-100.28	14C AMS (bone, antler, tooth, tusk)	33860 ± 330	38300 ± 1000	Fulton (1995)
GSC-653	Zelena	51.4	-101.23	14C Conv. (charcoal)	37700 ± 1500	41900 ± 2700	Lowdon and Blake (1968)
GSC-711	Zelena	51.4	-101.23	14C Conv. (organic-rich sediment)	28220 ± 380	32100 ± 950	Lowdon and Blake (1968)
GSC-1342	Runnymede	51.5	-101.7	14C Conv. (organic-rich sediment)	30000 ± 490	34100 ± 950	Lowdon and Blake (1973); Morlan et al. (2001)
S-559	Ochapowace	50.52	-102.3	14C Conv. (organic-rich sediment)	28915 ± 1140	32900 ± 2100	Morlan et al. (2001)
GSC-4322	Cape Richard Collinson	72.92	-102.42	14C Conv. (carbonate)	39300 ± 1900	42900 ± 3400	McNeely and McCuaig (1991)
S-563	Kahkewistahaw IV	50.53	-102.53	14C Conv. (organic-rich sediment)	28445 ± 1595	32500 ± 3150	Morlan et al. (2001)
S-554	Marieval VI	50.58	-102.65	14C Conv. (wood)	28890 ± 310	33000 ± 900	Morlan et al. (2001)
S-96	Outram	49.18	-103.32	14C Conv. (wood)	27750 ± 1200	31900 ± 2400	McCallum and Wittenberg (1962); Morlan et al. (2001)
S-534	Howe Lake	51.61	-103.34	14C (organic-rich sediment)	31710 ± 1420	35900 ± 3150	Christiansen et al. (1982)
S-535	Howe Lake	51.61	-103.34	14C (organic-rich sediment)	32830 ± 1630	37100 ± 3400	Christiansen et al. (1982)
S-536	Howe Lake	51.61	-103.34	14C (organic-rich sediment)	36940 ± 3680	40800 ± 7000	Christiansen et al. (1982)
S-423	Fort Qu'Appelle VI	50.77	-103.8	14C Conv. (organic-rich sediment)	28900 ± 1050	32900 ± 1900	Morlan et al. (2001)
GSC-5658	Bent Horn Creek	76.35	-103.87	14C Conv. (carbonate)	39000 ± 1480	42600 ± 2550	McNeely (2006)
SacA27173	North of Montreal Lake	54.68	-105.5	14C AMS (charcoal)	28290 ± 260	32200 ± 750	Bélanger et al. (2014)
SacA27179	North of Montreal Lake	54.68	-105.5	14C AMS (charcoal)	29030 ± 260	33200 ± 650	Bélanger et al. (2014)
SacA16564	North of Montreal Lake	54.68	-105.5	14C AMS (charcoal)	31470 ± 360	35400 ± 750	Bélanger et al. (2014)
SacA27175	North of Montreal Lake	54.68	-105.5	14C AMS (charcoal)	38250 ± 790	42400 ± 1250	Bélanger et al. (2014)
SacA27178	North of Montreal Lake	54.68	-105.5	14C AMS (charcoal)	38960 ± 850	42900 ± 1350	Bélanger et al. (2014)
SacA16561	North of Montreal Lake	54.68	-105.5	14C AMS (charcoal)	39030 ± 890	43000 ± 1400	Bélanger et al. (2014)
SacA16559	North of Montreal Lake	54.68	-105.5	14C AMS (charcoal)	39430 ± 940	43300 ± 1450	Bélanger et al. (2014)
SacA27176	North of Montreal Lake	54.68	-105.5	14C AMS (charcoal)	40000 ± 1000	43700 ± 1550	Bélanger et al. (2014)
SacA16563	North of Montreal Lake	54.68	-105.5	14C AMS (charcoal)	41000 ± 1100	44500 ± 1850	Bélanger et al. (2014)
SacA16558	North of Montreal Lake	54.68	-105.5	14C AMS (charcoal)	41200 ± 1200	44700 ± 2050	Bélanger et al. (2014)
SacA16560	North of Montreal Lake	54.68	-105.5	14C AMS (charcoal)	43800 ± 1600	47100 ± 2700†	Bélanger et al. (2014)
SacA16566	North of Montreal Lake	54.68	-105.5	14C AMS (charcoal)	43800 ± 1600	47100 ± 2700†	Bélanger et al. (2014)
SacA16562	North of Montreal Lake	54.68	-105.5	14C AMS (charcoal)	44200 ± 1700	47400 ± 2600†	Bélanger et al. (2014)
SacA16567	North of Montreal Lake	54.68	-105.5	14C AMS (charcoal)	50000 ± 3500	50000 ± 3500*	Bélanger et al. (2014)
SacA27177	North of Montreal Lake	54.68	-105.5	14C AMS (charcoal)	50100 ± 3300	50100 ± 3300*	Bélanger et al. (2014)
GSC-154	Nelson Griffiths Point	75.08	-106	14C Conv. (carbonate)	34050 ± +2650,-1990	37800 ± 5100	Dyck and Fyles (1964)
S-252	Alvena	52.61	-106.05	14C Conv. (organic-rich sediment)	33500 ± 2000	37700 ± 3950	McCallum and Wittenberg (1968); Christiansen (1968); Morlan et al. (2001)
GSC-1041	Kenaston	51.5	-106.31	14C Conv. (wood)	38000 ± 560	42200 ± 800	Lowdon and Blake (1970); Morlan et al. (2001)
SR-6023	Box Creek	47.79	-106.36	14C (bone, antler, tooth, tusk)	33660 ± 620	37900 ± 1550	Hill (2006)
Beta-155639	Box Creek	47.79	-106.36	14C AMS (bone, antler, tooth, tusk)	33280 ± 320	37500 ± 950	Hill (2006)
S-251	Wandsworth	52.89	-106.62	14C Conv. (organic-rich sediment)	34000 ± 1800	38200 ± 3600	McCallum and Wittenberg (1968); Morlan et al. (2001)
S-1369	Dalmeny	52.29	-106.71	14C Conv. (wood)	30920 ± 2060	35100 ± 4300	Rutherford et al. (1984); Morlan et al. (2001)
S-3605	Lancer thrust moraine	50.77	-108.7	14C Conv. (wood)	31300 ± 1400	35400 ± 3150	Morlan et al. (2001)
S-267	Marsden	52.81	-109.82	14C Conv. (peat)	33000 ± 2000	37300 ± 4100	McCallum and Wittenberg (1968); Christiansen (1968); Morlan et al. (2001)
I-1878	Irvine	49.92	-110.27	14C (charcoal)	34900 ± +3000, -2200	38900 ± 5700	Bik (1969); Jackson and Pawson (1984)
GX-102	Twin Cliffs	50.07	-110.63	14C (wood)	29200 ± +8100, -4000	32800 ± 16000	Jackson and Pawson (1984)
GSC-1370	Evil Smelling Bluff	50.1	-110.63	14C Conv. (wood)	25000 ± 800	29100 ± 1550	Lowdon et al. (1971)
GSC-144-1	Galt Island Bluff	50.15	-110.65	14C Conv. (wood)	37700 ± 1100	41900 ± 1900	Jackson et al. (2011)
GSC-144-2	Galt Island Bluff	50.15	-110.65	14C Conv. (wood)	37900 ± 1100	42100 ± 1900	Jackson et al. (2011)
GSC-578	Medicine Hat	50.1	-110.66	14C Conv. (wood)	28630 ± 800	32600 ± 1500	Lowdon et al., (1967); Jackson et al. (2011)
GSC-1442	Galt Island - Medicine Hat	50.08	-110.82	14C Conv. (wood)	37900 ± 1100	42100 ± 1900	Lowdon and Blake (1975)
GSC-1442-2	Galt Island - Medicine Hat	50.08	-110.82	14C Conv. (wood)	38700 ± 1100	42700 ± 1800	Lowdon and Blake (1975)
GSC-787_outer	Winter Harbour Moraine	74.64	-110.85	14C Conv. (carbonate)	33800 ± 900	37600 ± 2100	Lowdon and Blake (1968)
GSC-787_inner	Winter Harbour Moraine	74.64	-110.85	14C Conv. (carbonate)	42400 ± 1900	45500 ± 3350	Lowdon and Blake (1968)
GSC_667_outer	Winter Harbour Moraine	74.78	-110.87	14C Conv. (carbonate)	26700 ± 450	30400 ± 850	Lowdon and Blake (1968)
GSC-667_inner	Winter Harbour Moraine	74.78	-110.87	14C Conv. (carbonate)	27790 ± 480	31300 ± 1000	Lowdon and Blake (1968)
TO-10635	Winter Harbour	74.79	-110.97	14C AMS (carbonate)	26280 ± 370	30100 ± 850	England et al. (2009)
TO-10634	Winter Harbour	74.79	-110.97	14C AMS (carbonate)	29190 ± 220	32900 ± 750	England et al. (2009)
UCIAMS-24791	Winter Harbour	74.79	-110.97	14C AMS (carbonate)	35560 ± 290	39700 ± 750	England et al. (2009)
UCIAMS-25399	Winter Harbour	74.79	-110.97	14C AMS (carbonate)	38190 ± 780	42100 ± 1250	England et al. (2009)
UCIAMS-24792	Winter Harbour	74.79	-110.97	14C AMS (carbonate)	38640 ± 410	42400 ± 600	England et al. (2009)
TO-10625	Cape Clarendon	74.72	-110.99	14C AMS (carbonate)	25520 ± 200	29200 ± 500	England et al. (2009)
TO-10627	Cape Phipps	74.72	-110.99	14C AMS (carbonate)	27860 ± 250	31300 ± 400	England et al. (2009)
TO-10626	Cape Phipps	74.72	-110.99	14C AMS (carbonate)	28810 ± 250	32300 ± 800	England et al. (2009)
UCIAMS-25398	Cape Phipps	74.72	-110.99	14C AMS (carbonate)	33930 ± 470	37800 ± 1200	England et al. (2009)
UCIAMS-24790	Cape Phipps	74.72	-110.99	14C AMS (carbonate)	38790 ± 430	42500 ± 600	England et al. (2009)
UCIAMS-24789	Cape Phipps	74.72	-110.99	14C AMS (carbonate)	42840 ± 690	45700 ± 1350	England et al. (2009)
TO-12128	Table Hills	74.81	-111.02	14C AMS (carbonate)	29740 ± 260	33500 ± 550	England et al. (2009)
TO-10637	Table Hills	74.81	-111.02	14C AMS (carbonate)	30210 ± 250	33900 ± 450	England et al. (2009)
TO-10636	Table Hills	74.81	-111.02	14C AMS (carbonate)	35630 ± 370	39800 ± 900	England et al. (2009)
UCIAMS-25404	Table Hills	74.81	-111.02	14C AMS (carbonate)	35980 ± 600	40200 ± 1300*	England et al. (2009)
TO-12129	Table Hills	74.81	-111.02	14C AMS (carbonate)	36070 ± 450	40300 ± 1050	England et al. (2009)
TO-12126	Table Hills	74.81	-111.02	14C AMS (carbonate)	38820 ± 630	42500 ± 900	England et al. (2009)
TO-12139	Table Hills	74.81	-111.02	14C AMS (carbonate)	40210 ± 620	43500 ± 1050	England et al. (2009)
UCIAMS-24773	Table Hills	74.81	-111.02	14C AMS (carbonate)	43350 ± 740	46200 ± 1500	England et al. (2009)
UCIAMS-25405	Table Hills	74.81	-111.02	14C AMS (carbonate)	43800 ± 1600	46800 ± 2850*	England et al. (2009)
TO-12127	Table Hills	74.81	-111.02	14C AMS (carbonate)	45310 ± 1000	48200 ± 1800†	England et al. (2009)
UCIAMS-25400	Table Hills	74.81	-111.02	14C AMS (carbonate)	48900 ± 3000	48900 ± 3000*	England et al. (2009)
ETH-29215	Hanging Stone Lake (site 401)	56.21	-111.43	14C AMS (wood)	34980 ± 390	39500 ± 900	Fisher et al. (2009)
ETH-29216	Hanging Stone Lake (site 401)	56.21	-111.43	14C AMS (wood)	42540 ± 780	45800 ± 1550	Fisher et al. (2009)
TO-1464	Dinosaur Provincial Park	50.77	-111.48	14C AMS (carbonate)	27420 ± 240	31300 ± 350	Evans and Campbell (1992)
TO-2693	Dinosaur Provincial Park	50.77	-111.48	14C AMS (plants, seeds)	52450 ± 1910	52500 ± 1950*	Evans and Campbell (1995)
TO-11296	Cape Clarendon	74.62	-111.49	14C AMS (carbonate)	27010 ± 200	30800 ± 350	England et al. (2009)
TO-11302	Cape Clarendon	74.62	-111.49	14C AMS (carbonate)	30000 ± 260	33800 ± 550	England et al. (2009)
UCIAMS-24781	Cape Clarendon	74.62	-111.49	14C AMS (carbonate)	30170 ± 150	33900 ± 300	England et al. (2009)
TO-11301	Cape Clarendon	74.62	-111.49	14C AMS (carbonate)	31400 ± 300	34900 ± 650	England et al. (2009)
UCIAMS-24780	Cape Clarendon	74.62	-111.49	14C AMS (carbonate)	31750 ± 190	35200 ± 450	England et al. (2009)
UCIAMS-24782	Cape Clarendon	74.62	-111.49	14C AMS (carbonate)	34670 ± 260	38800 ± 600	England et al. (2009)
UCIAMS-24776	Cape Clarendon	74.62	-111.49	14C AMS (carbonate)	36170 ± 310	40400 ± 750	England et al. (2009)
UCIAMS-24779	Cape Clarendon	74.62	-111.49	14C AMS (carbonate)	41300 ± 570	44400 ± 1050	England et al. (2009)
TO-11300	Cape Clarendon	74.62	-111.6	14C AMS (carbonate)	26510 ± 500	30200 ± 1000	England et al. (2009)
UCIAMS-24778	Cape Clarendon	74.62	-111.6	14C AMS (carbonate)	42580 ± 680	45500 ± 1300	England et al. (2009)
ETH-32167	Sandy Bog Lake (site 554)	56.32	-111.93	14C AMS (peat)	37820 ± 520	42100 ± 750	Fisher et al. (2009)
TO-12124	Cape Hay	74.62	-112.18	14C AMS (carbonate)	25170 ± 220	28800 ± 550	England et al. (2009)
TO-12125	Cape Hay	74.62	-112.18	14C AMS (carbonate)	30190 ± 310	33900 ± 600	England et al. (2009)
UCIAMS-24772	Cape Hay	74.62	-112.18	14C AMS (carbonate)	41870 ± 620	44900 ± 1150	England et al. (2009)
UCIAMS-24771	Cape Hay	74.62	-112.18	14C AMS (carbonate)	48800 ± 1400	48800 ± 1400*	England et al. (2009)
UCIAMS-25402	Cape Hay	74.62	-112.18	14C AMS (carbonate)	50300 ± 3500	50300 ± 3500*	England et al. (2009)
GSC-728	Taber	49.9	-112.2	14C Conv. (wood)	35980 ± 1060	40500 ± 2000	Lowdon and Blake (1968); Jackson et al. (2011)
TO-871	Courtney W.	51.52	-112.32	14C AMS (bone, antler, tooth, tusk)	33450 ± 350	37700 ± 1000	Young et al. (1999)
TO-1304	Winter 1	51.57	-112.33	14C AMS (bone, antler, tooth, tusk)	29610 ± 220	33800 ± 400	Young et al. (1999)
TO-1142	Winter 1	51.57	-112.33	14C AMS (bone, antler, tooth, tusk)	33650 ± 340	38000 ± 1000	Young et al. (1999)
TO-782	Schowalter	51.55	-112.34	14C AMS (bone, antler, tooth, tusk)	28000 ± 250	31800 ± 700	Young et al. (1999)
GSC-5359	Consolidated Pit 48	53.66	-113.26	14C Conv. (wood)	32500 ± 900	36600 ± 2000	McNeely (2002)
OxA-11613	Consolidated Pit 48	53.66	-113.26	14C (bone, antler, tooth, tusk)	34050 ± 450	38500 ± 1300	Shapiro et al. (2004)
AECV:1664c	Consolidated Pit 48	53.66	-113.26	14C (bone, antler, tooth, tusk)	40000 ± 3070	43800 ± 5550	Shapiro et al. (2004)
OxA-11620	Consolidated Pit 48	53.66	-113.26	14C (bone, antler, tooth, tusk)	53800 ± 2200	53800 ± 2200*	Shapiro et al. (2004)
AECV:1102c	Consolidated Pit 48	53.66	-113.26	14C (bone, antler, tooth, tusk)	26750 ± 790	30800 ± 1750	Young et al. (1994)
AECV:937c	Consolidated Pit 48	53.66	-113.26	14C (bone, antler, tooth, tusk)	27520 ± 850	31600 ± 1850	Young et al. (1994)
AECV:936c	Consolidated Pit 48	53.66	-113.26	14C (bone, antler, tooth, tusk)	31750 ± 1460	35900 ± 3250	Young et al. (1994)
AECV:938c	Consolidated Pit 48	53.66	-113.26	14C (bone, antler, tooth, tusk)	35840 ± 2370	39900 ± 4500	Young et al. (1994)
AECV:940c	Consolidated Pit 48	53.66	-113.26	14C (bone, antler, tooth, tusk)	36150 ± 2960	40100 ± 5550	Young et al. (1994)
AECV:934c	Consolidated Pit 48	53.66	-113.26	14C (bone, antler, tooth, tusk)	37120 ± 2370	41100 ± 4550	Young et al. (1994)
AECV:935c	Consolidated Pit 48	53.66	-113.26	14C (bone, antler, tooth, tusk)	38960 ± 3520	42800 ± 6550	Young et al. (1994)
AECV:921c	Consolidated Pit 48	53.66	-113.26	14C (wood)	37500 ± 2650	41500 ± 5100	Young et al. (1994)
AECV:1465c	Consolidated Pit 48	53.66	-113.26	14C (wood)	37800 ± 2060	41900 ± 3900	Young et al. (1994)
AECV:920c	Consolidated Pit 48	53.66	-113.26	14C (wood)	40670 ± 4130	44100 ± 6350†	Young et al. (1994)
Beta-342758	Inland Aggregates Pit 48	53.66	-113.28	14C AMS (bone, antler, tooth, tusk)	41460 ± 570	44900 ± 1050	Jass and Beaudoin (2014)
AECV:941c	Consolidated Riverview	53.66	-113.28	14C (bone, antler, tooth, tusk)	31290 ± 1960	35500 ± 4150	Young et al. (1994)
AECV:1478c	Consolidated Riverview	53.66	-113.28	14C (bone, antler, tooth, tusk)	36900 ± 2030	41000 ± 3950	Young et al. (1994)
I:10650	Horse Hills	53.65	-113.31	14C (bone, antler, tooth, tusk)	26050 ± 880	30100 ± 1650	Young et al. (1994)
AECV:1201c	Clover Bar	53.59	-113.32	14C (bone, antler, tooth, tusk)	25210 ± 760	29400 ± 1500	Young et al. (1994)
AECV:721c	Apex Pit	53.63	-113.32	14C (bone, antler, tooth, tusk)	27860 ± 880	32000 ± 1750	Young et al. (1994)
AECV:612c	Apex Pit	53.63	-113.32	14C (bone, antler, tooth, tusk)	28890 ± 960	32900 ± 1750	Young et al. (1994)
AECV:720c	Apex Pit	53.63	-113.32	14C (bone, antler, tooth, tusk)	29380 ± 4970	33500 ± 9850	Young et al. (1994)
AECV:1202c	Clover Bar	53.59	-113.32	14C (bone, antler, tooth, tusk)	31220 ± 1260	35300 ± 2850	Young et al. (1994)
Beta-115201	Near Edmonton	53.6	-113.33	14C AMS (bone, antler, tooth, tusk)	43100 ± 490	46300 ± 1050	Harington (2003)
TO-10545	Jean Lake	57.47	-113.75	14C AMS (plants, seeds)	32690 ± 340	36700 ± 1050	Paulen et al. (2005)
TO-3561	Brock Island	77.75	-113.8	14C AMS (carbonate)	28270 ± 210	31600 ± 600	McNeely (2005)
TO-4246	Brock Island	77.75	-113.8	14C AMS (carbonate)	34890 ± 420	39000 ± 1000	McNeely (2005)
S-205	Sharp Hills	51.35	-114	14C Conv. (peat)	33500 ± 2000	37700 ± 3950	McCallum and Wittenberg (1968); Jackson and Pawson (1984)
GSC-381	Brock Island	77.97	-114.05	14C Conv. (carbonate)	38590 ± 1340	42300 ± 2350	Lowdon et al. (1967)
AECV:1581c	Consolidated Pit 45	53.7	-114.05	14C (wood)	35500 ± 2530	39600 ± 4800	Young et al. (1994)
AECV:1582c	Consolidated Pit 45	53.7	-114.05	14C (wood)	35760 ± 2130	39900 ± 4100	Young et al. (1994)
AECV:1583c	Consolidated Pit 45	53.7	-114.05	14C (wood)	41110 ± 3750	44600 ± 5700†	Young et al. (1994)
AECV:1580c	Consolidated Pit 45	53.7	-114.05	14C (wood)	41400 ± 3990	44700 ± 5800†	Young et al. (1994)
AECV:1658c	Consolidated Pit 45	53.7	-114.05	14C (wood)	42910 ± 3940	45800 ± 4950†	Young et al. (1994)
GSC-2409	Minapore	50.91	-114.06	14C Conv. (wood)	49400 ± 1000	49400 ± 1000*	Lowdon and Blake (1978); Jackson and Pawson (1984)
S-206	Carstairs	51.33	-114.17	14C Conv. (peat)	26700 ± 1400	30700 ± 2800	McCallum and Wittenberg (1968); Jackson and Pawson (1984)
AECV:599c	Consolidated Pit 46	53.82	-114.56	14C (bone, antler, tooth, tusk)	27730 ± 1060	31900 ± 2150	Young et al. (1994)
TO:1828	Consolidated Pit 46	53.82	-114.56	14C (bone, antler, tooth, tusk)	31520 ± 450	35400 ± 900	Young et al. (1994)
AECV:718c	Consolidated Pit 46	53.82	-114.56	14C (bone, antler, tooth, tusk)	39960 ± 3950	43600 ± 6550†	Young et al. (1994)
GSC-1019-2	Freeman Section	54.36	-114.88	14C Conv. (wood)	52200 ± 1760	52200 ± 1800*	Lowdon et al. (1971)
GSC-4218	Strubel Lake	52.2	-115	14C Conv. (organic-rich sediment)	29700 ± 1260	33700 ± 2450	McNeely and McCuaig (1991)
GSC-3517	Goldeye Lake	52.45	-116.2	14C Conv. (organic-rich sediment)	31300 ± 1100	35300 ± 2450	McNeely (1989)
GSC-3654	Goldeye Lake	52.45	-116.2	14C Conv. (organic-rich sediment)	32200 ± 820	36200 ± 1900	McNeely (1989)
AECV-416C	Watino	55.72	-117.63	14C (wood)	31530 ± 1440	35700 ± 3200	Liverman et al. (1989)
AECV-415C	Watino	55.72	-117.63	14C (wood)	36220 ± 2520	40300 ± 4800	Liverman et al. (1989)
GSC-1020	Watino	55.72	-117.63	14C Conv. (wood)	43500 ± 620	46700 ± 1350	Lowdon and Blake (1970); Jackson and Pawson (1984)
I-4878	Watino	55.72	-117.63	14C (organic-rich sediment)	27400 ± 850	31500 ± 1850	Reimchen (1968)
I-2615	Watino	55.72	-117.63	14C Conv. (wood)	35500 ± +3000, -2000	39500 ± 5650	mentioned in Lowdon and Blake (1970); original publication unknown
I-2516	Watino	55.72	-117.63	14C Conv. (wood)	35500 ± +2300, -1800	39600 ± 4350	mentioned in Lowdon and Blake (1970); original publication unknown
AECV-428C	Simonette	55.08	-118.17	14C (wood)	37010 ± 2690	41000 ± 5150	Liverman et al. (1989)
UCI-50741	Jesse Till	72.87	-118.22	14C AMS (carbonate)	49500 ± 1210	49500 ± 1250*	Lakeman (2012)
UCI-50748	Jesse Till II	72.93	-118.39	14C AMS (carbonate)	41490 ± 460	44600 ± 900	Lakeman (2012)
UCI-50749	Jesse Till III	73.09	-118.94	14C AMS (carbonate)	46100 ± 790	48900 ± 1300†	Lakeman (2012)
GSC-2375-2	Dissection River	73.27	-119.53	14C Conv. (peat)	49100 ± 980	49100 ± 1000*	Blake (1987)
UCI-60264	Jesse Till VI	72.25	-120	14C AMS (carbonate)	48000 ± 1700	48000 ± 1700*	Lakeman (2012)
UCI-60269	Jesse Till VII	72.23	-120.01	14C AMS (carbonate)	32530 ± 250	36000 ± 600	Lakeman (2012)
UCI-60272	Jesse Till IX	72.19	-120.16	14C AMS (carbonate)	55200 ± 4000	55200 ± 4000*	Lakeman (2012)
UCI-60261	Jesse Till V	72.22	-120.19	14C AMS (carbonate)	49700 ± 2100	49700 ± 2100*	Lakeman (2012)
UCI-60271	Jesse Till VIII	72.11	-120.2	14C AMS (carbonate)	39610 ± 600	43000 ± 950	Lakeman (2012)
UCI-60273	Jesse Till X	72.07	-120.25	14C AMS (carbonate)	32640 ± 260	36100 ± 600	Lakeman (2012)
TO-650	East Coast Sea	72.04	-120.28	14C AMS (carbonate)	24730 ± 260	28400 ± 550	McNeely and Jorgensen (1992)
UCI-60258	Jesse Till IV	72.28	-120.32	14C AMS (carbonate)	44000 ± 1000	46900 ± 2050	Lakeman (2012)
GSC-2234-2	Cape Collinson	71.24	-122.34	14C Conv. (wood)	53100 ± 1560	53100 ± 1600*	Blake (1984)
GSC-2780	Banks Island BK Series	71.35	-122.5	14C Conv. (organic-rich sediment)	26900 ± 1560	31000 ± 3050	Blake (1987)
GSC-3819	Banks Island BK Series	71.35	-122.5	14C Conv. (organic-rich sediment)	34100 ± 1060	38400 ± 2450	Blake (1987)
GSC-222-2	Nelson Head	76.14	-122.7	14C Conv. (wood)	47000 ± 1000	47000 ± 1000*	Blake (1987)
UCIAMS-23884	Ochre River	63.56	-123.55	14C AMS (plants, seeds)	50900 ± 2400	50900 ± 2400*	Huntley et al. (2008)
UCIAMS-23872	Dahadinni River	63.97	-124.44	14C AMS (plants, seeds)	51600 ± 2600	51600 ± 2600*	Huntley et al. (2008)
UCIAMS-23873	Dahadinni River	63.97	-124.44	14C AMS (plants, seeds)	52200 ± 2800	52200 ± 2800*	Huntley et al. (2008)
UCIAMS-23866	Dahadinni River	63.84	-124.81	14C AMS (plants, seeds)	45430 ± 7200	45100 ± 7350†	Huntley et al. (2008)
AECV-919C	Mackenzie River site 20	64.67	-124.86	14C (wood)	34730 ± 3280	38800 ± 6250	Smith (1992)
AECV-918C	Mackenzie River site 25	64.49	-124.87	14C (wood)	34020 ± 1410	38300 ± 3050	Smith (1992)
TO-1187	Mackenzie River site 23	64.56	-124.89	14C AMS (wood)	45570 ± 700	48900 ± 1300†	Smith (1992)
TO-1186	Mackenzie River site 24	64.52	-124.89	14C AMS (wood)	52130 ± 1310	52100 ± 1350*	Smith (1992)
TO-1188	Mackenzie River site 22	64.59	-125.03	14C AMS (wood)	27260 ± 260	31200 ± 350	Smith (1992)
UCIAMS-26790	Redstone River	63.63	-125.43	14C AMS (wood)	41500 ± 1800	45000 ± 3200	Huntley et al. (2008)
TO-2294	Worth Point (III)	72.18	-125.66	14C AMS (bone, antler, tooth, tusk)	41910 ± 800	45300 ± 1500	McNeely and Jorgensen (1992)
TO-2206	Worth Point (II)	72.18	-125.66	14C AMS (carbonate)	41090 ± 770	44200 ± 1300	McNeely and Jorgensen (1992); Evans and Mott (1993)
TO-195	Little Bear River	64.13	-126.72	14C AMS (wood)	44420 ± 630	47700 ± 1500	Hughes et al. (1993)
TO-1192	Mackenzie River site 19	65.23	-126.93	14C AMS (wood)	27170 ± 250	31100 ± 350	Smith (1992)
Shfd02062	Tuktoyaktuk coastland	69.95	-129.73	luminescence (OSL)		29600 ± 1600	Bateman and Murton (2006)
Shfd02061	Tuktoyaktuk coastland	69.95	-129.73	luminescence (OSL)		43400 ± 2400	Bateman and Murton (2006)
TO-2697	Liverpool Bay	69.61	-130.01	14C AMS (bone, antler, tooth, tusk)	40100 ± 680	43800 ± 1150	Harington (2003)
GSC-1682	Eskimo Lakes	69.41	-131.99	14C Conv. (plants, seeds)	34500 ± 690	39000 ± 1800	Blake (1987)
Shfd06062	Site 05-01	69.52	-133.89	luminescence (OSL)		31000 ± 2700	Murton et al., (2017)
Shfd06063	Site 05-01	69.52	-133.89	luminescence (OSL)		41000 ± 2900	Murton et al., (2017)
Beta-77432	Kidluit Bay	69.5	-133.91	14C AMS (plants, seeds)	31290 ± 350	35200 ± 750	McNeely (2006)
Shfd08152	Site 08-16	69.54	-133.93	luminescence (OSL)		53100 ± 2600	Murton et al. (2017)
Shfd08151	Site 08-16	69.54	-133.93	luminescence (OSL)		57100 ± 3400	Murton et al. (2017)
Shfd08143	Site 08-04	69.51	-133.98	luminescence (OSL)		53000 ± 5000	Murton et al. (2017)
Shfd08146	Site 08-04	69.51	-133.98	luminescence (OSL)		58000 ± 4600	Murton et al. (2017)
Beta-74433	Richards Island	69.53	-134	14C AMS (other organic material)	37400 ± 810	41800 ± 1350	Dallimore et al. (1997)
Beta-74434	Richards Island	69.53	-134	14C AMS (plants, seeds)	33710 ± 460	38000 ± 1250	Dallimore et al. (1997)
CAMS-66370	Near Inuvik	68	-134	14C AMS (bone, antler, tooth, tusk)	39800 ± 1200	43600 ± 1850	Harington (2003)
CAMS-66371	North Head of Richards Island	69.57	-134.5	14C AMS (bone, antler, tooth, tusk)	41400 ± 1500	44900 ± 2650	Harington (2003)
RIDDL-801	Kendall Island	69.49	-135.28	14C (carbonate)	48200 ± 1100	48200 ± 1100*	McNeely (2006)
TO-796	Garry Island	69.5	-135.7	14C AMS (carbonate)	43550 ± 470	46300 ± 1000	McNeely (2006)
Reference list for Table DR1 A & B
Anderson, R. S., David, R. B., Stuckenrath, R., and Borns, H. W., Jr., 1988, Interstadial conifer wood from northern Maine: Quaternary Research, v. 30, p. 98-101.
Andrews, J. T., 1987, The Late Wisconsin Glaciation and deglaciation of the Laurentide Ice Sheet, North America and adjacent oceans during the last deglaciation, Volume K-3, The Geological Society of America, p. 13-37.
Andrews, J. T., Laymon, C. A., and Briggs, W. M., 1989, Radiocarbon date list III: Labrador and Northern Quebec, Canada and Radiocarbon List VI: Baffin Island, N.W.T., Canada: Institute of Arctic and Alpine Research Occasional Paper No. 46.
Bajc, A. F., Karrow, P. F., Yansa, C. H., Curry, B. B., Nekola, J. C., Seymour, K. L., and Mackie, G. L., 2015, Geology and paleoecology of a Middle Wisconsin fossil occurrence in Zorra Township, southwestern Ontario, Canada: Canadian Journal of Earth Sciences, v. 52, no. 6, p. 386-404.
Barr, W., 1971, Postglacial Isostatic Movement in Northeastern Devon Island: A Reappraisal: Arctic, v. 24, no. 4, p. 249-268.
Barrette, L., La Salle, P., and Samson, C., 1981, Quebec radiocarbon measurements III: Radiocarbon, v. 23, no. 2, p. 241-251.
Bateman, M. D., and Murton, J. B., 2006, The chronostratigraphy of Late Pleistocene glacial and periglacial aeolian activity in the Tuktoyaktuk Coastlands, NWT, Canada: Quaternary Science Reviews, v. 25, no. 19-20, p. 2552-2568.
Bednarski, J. M., 1995, Glacial advances and stratigraphy in Otto Fiord and adjacent areas, Ellesmere Island, Northwest Territories: Canadian Journal of Earth Sciences, v. 32, no. 1, p. 52-64.
Bednarski, J. M., 1998, Quaternary history of Axel Heiberg Island bordering Nansen Sound, Northwest Territories, emphasizing the last glacial maximum: Canadian Journal of Earth Sciences, v. 35, no. 5, p. 520-533.
Bélanger, N., Carcaillet, C., Padbury, G. A., Harvey-Schafer, A. N., and Van Rees, K. J., 2014, Periglacial fires and trees in a continental setting of Central Canada, Upper Pleistocene: Geobiology, v. 12, no. 2, p. 109-118.
Bell, T., 1992, Glacial and sea level history of western Fosheim Peninsula, Ellesmere Island, Arctic Canada: University of Alberta, PhD thesis.
Bell, T., 1996, The last glaciation and sea level history of Fosheim Peninsula, Ellesmere Island, Canadian High Arctic: Canadian Journal of Earth Sciences, v. 33, no. 7, p. 1075-1086.
Bell, T., Batterson, M., and Blundon, P., 2008, A re-evaluation of the coastal stratigraphy along the southwestern Burin Peninsula: Current Research (2008) Newfoundland and Labrador Department of Natural Resources Geological Survey, v. Report 08-1, p. 35-44.
Berger, G. W., 1984, Thermoluminescence dating studies of glacial silts from Ontario: Canadian Journal of Earth Sciences, v. 21, p. 1393-1399.
Berger, G. W., and Eyles, N., 1994, Thermoluminescence chronology of Toronto-area Quaternary sediments and implications for the extent of the midcontinent ice sheet(s): Geology, v. 22, p. 31-34.
Berger, G. W., and Nielsen, E., 1990, Evidence from thermoluminescence dating for Middle Wisconsinan deglaciation in the Hudson Bay Lowland of Manitoba: Canadian Journal of Earth Sciences, v. 28, p. 240-249.
Berti, A. A., 1975, Paleobotany of Wisonsinan Insterstadials, Eastern Great Lakes Region, North America: Quaternary Research, v. 5, p. 591-619.
Bik, M. J. J., 1969, The origin and age of the prairie mounds of southern Alberta: Biuletyn Peryglacjalny, v. 19, p. 85-130.
Blake, W. Jr., 1983, Geological Survey of Canada Radiocarbon Dates XXII: Geological Survey of Canada Paper 83-7.
Blake, W. Jr., 1984, Geological Survey of Canada Radiocarbon Dates XXIV: Geological Survey of Canada Paper 84-7.
Blake, W. Jr., 1986, Geological Suvey of Canada Radiocarbon Dates XXV: Geological Survey of Canada Paper 85-7.
Blake, W. Jr., 1987, Geological Survey of Canada Radiocarbon Dates XXVI: Geological Survey of Canada Paper 86-7.
Blake, W. Jr., 1988, Geological Survey of Canada Radiocarbon Dates XXVII: Geological Survey of Canada Paper 87-7.
Blake, W. Jr., 1993, Holocene emergence along the Ellesmere Island coasts of northernmost Baffin Bay: Norsk Geologisk Tidsskrift, v. 73, p. 147-160.
Bloom, A. L., 1972, Schedule and guidebook. Friends of the Pleistocene 35th Annual Reunion, Cornell University, 20 pp.
Briner, J. P., 2003, The last glaciation of the Clyde Region, Northeastern Baffin Island, Arctic Canada: Cosmogenic isotpe constrains on Laurentide Ice Sheet dynamics and chronology: University of Colorado, PhD thesis.
Briner, J. P., Miller, G. H., Davis, P. T., and Finkel, R. C., 2005, Cosmogenic exposure dating in arctic glacial landscapes: implications for the glacial history of northeastern Baffin Island, Arctic Canada: Canadian Journal of Earth Sciences, v. 42, no. 1, p. 67-84.
Briner, J. P., Miller, G. H., Davis, P. T., and Finkel, R. C., 2006, Cosmogenic radionuclides from fiord landscapes support differential erosion by overriding ice sheets: Geological Society of America Bulletin, v. 118, no. 3-4, p. 406-420.
Buckley, J., and Willis, E. H., 1972, Isotopes' radiocarbon measurements IX: Radiocarbon, v. 14, no. 1, p. 114-139.
Calkin, P. E., Muller, E. H., and Barnes, J. H., 1982, The Gowanda hospital interstadial site, New York: American Journal of Science, v. 282, no. 7, p. 1110-1142.
Christiansen, E. A., Gendzwill, D. J., and Meneley, W. A., 1982, Howe lake: a hydrodynamic blowout structure: Canadian Journal of Earth Sciences, v. 19, p. 1122-1139.
Colgan, P. M., Vanderlip, C. A., and Braunschneider, K. N., 2015, Athens Subepisode (Wisconsin Episode) non-glacial, and older glacial sediments in the subsurface of southwestern Michigan, USA: Quaternary Research, v. 84, no. 3, p. 382-397.
Cong, S., Ashworth, A. C., Schwert, D. P., and Totten, S. M., 1996, Fossil Beetle Evidence for a Short Warm Interval near 40,000 yr B.P. at Titusville, Pennsylvania: Quaternary Research, v. 45, no. 2, p. 216-225.
Dallimore, S. R., Wolfe, S. A., Matthews, J. V. J., and Vincent, J. S., 1997, Mid-Wisconsinan eolian deposits of the Kittigazuit Formation, Tuktoyaktuk Coastlands, Northwest Territories, Canada: Canadian Journal of Earth Sciences, v. 34, no. 11, p. 1421-1441.
Dalton, A. S., Finkelstein, S. A., Barnett, P. J., and Forman, S. L., 2016, Constraining the Late Pleistocene history of the Laurentide Ice Sheet by dating the Missinaibi Formation, Hudson Bay Lowlands, Canada: Quaternary Science Reviews, v. 146, p. 288-299.
Dalton, A. S., Väliranta, M., Barnett, P. J., and Finkelstein, S. A., 2017, Pollen and macrofossil-inferred paleoclimate at the Ridge Site, Hudson Bay Lowlands, Canada: Evidence for a dry climate and significant recession of the Laurentide Ice Sheet during Marine Isotope Stage 3: Boreas, v. 46, no. 3, p. 388-401.
DiLabio, R. N. W., Miller, R. F., Mott, R. J., and Coker, W. B., 1988, The Quaternary stratigraphy of the Timmins area, Ontario, as an aid to mineral exploration by drift prospecting: Geological Survey of Canada paper 88-1C, p. 61-66.
Dionne, J.-C., and Occhietti, S., 1996, Aperçu du Quaternaire à l’embouchure du Saguenay, Québec: Géographie physique et Quaternaire, v. 50, no. 1, p. 5-34.
Dorion, C. C., 1997, An updated high resolution chronology of deglaciation and accompanying marine transgression in Maine: University of Maine, MSc thesis, 147 p.
DeVries, H. and Dreimanis, A., 1960, Finite Radiocarbon Dates of the Port Talbot Interstadial Deposits in Southern Ontario: Science, v. 131, no. 3415, p. 1738-1739.
Dremanis, A., Terasmae, J., and McKenzie, G. D., 1966, The Port Talbot Interstade of the Wisconsin Glaciation: Canadian Journal of Earth Sciences, v. 3, no. 3, p. 305-325.
Dunhill, G., Andrews, J. T., and Kristjánsdóttir, G. B., 2004, Radiocarbon Date List X: Baffin Bay, Baffin Island, Iceland, Labrador Sea, and the Northern North Atlantic: Institute of Arctic and Alpine Research Occasional Paper No. 56.
Dyck, W., and Fyles, J. G., 1962, Geological Survey of Canada Radiocarbon Dates I: Radiocarbon, v. 4, p. 13-26.
Dyck, W., 1964, Geological Survey of Canada Radiocarbon Dates III: Radiocarbon, v. 6, p. 167-181.
Dyck, W., Fyles, J. G. and Blake, W. Jr., 1965, Geological Survey of Canada Radiocarbon Dates IV, Geological Survey of Canada Paper 65-4.
Dyck, W., Lowdon, J. A., Fyles, J. G. and Blake, W. Jr., 1966, Geological Survey of Canada Radiocarbon Dates V, Geological Survey of Canada Paper 66-48.
Dyke, A. S., 1999, Last Glacial Maxiumm and deglaciation of Devon Island, Arctic Canada: support for an Innuitian ice sheet: Quaternary Science Reviews, v. 18, no. 3, p. 393-420.
England, J., 1978, The glacial geology of northeastern Ellesmere Island, N.W.T., Canada: Canadian Journal of Earth Sciences, v. 15, no. 4, p. 603-617.
England, J., 1990, The late Quaternary history of Greely Fiord and its tributaries, west-central Ellesmere Island: Canadian Journal of Earth Sciences, v. 27, no. 2, p. 255-270.
England, J., 1996, Glacier dynamics and paleoclimatic change during the last glaciation of eastern Ellesmere Island, Canada: Canadian Journal of Earth Sciences, v. 33, no. 5, p. 779-799.
England, J., 1999, Coalescent Greenland and Innuitian ice during the Last Glacial Maximum: revising the Quaternary of the Canadian High Arctic: Quaternary Science Reviews, v. 18, no. 3, p. 421-456.
England, J., Smith, I. R., and Evans, D. J. A., 2000, The last glaciation of east-central Ellesmere Island, Nunavut: ice dynamics, deglacial chronology, and sea level change: Canadian Journal of Earth Sciences, v. 37, no. 10, p. 1355-1371.
England, J. H., Furze, M. F. A., and Doupé, J. P., 2009, Revision of the NW Laurentide Ice Sheet: implications for paleoclimate, the northeast extremity of Beringia, and Arctic Ocean sedimentation: Quaternary Science Reviews, v. 28, no. 17-18, p. 1573-1596.
Eschman, D. F., 1980, Some evidence of Mid-Wisconsinan Events in Michigan: Michigan Academian, v. 12, p. 423-436.
Evans, D. J. A., and Campbell, I. A., 1992, Glacial and postglacial stratigraphy of Dinosaur Park and surrounding plains, southern Alberta, Canada: Quaternary Science Reviews, v. 11, no. 5, p. 535-555.
Evans, D. J. A., 1995, Quaternary Stratigraphy of the buried valleys of the lower Red Deer River, Alberta, Canada: Journal of Quaternary Science, v. 10, no. 2, p. 123-148.
Evans, D. J. A., and Mott, R. J., 1993, Stratigraphy and palaeoecology of a possible interglacial site, northernmost Ellesmere Island, Canada: Journal of Quaternary Science, v. 8, no. 3, p. 251-262.
Fisher, T. G., Waterson, N., Lowell, T. V., and Hajdas, I., 2009, Deglaciation ages and meltwater routing in the Fort McMurray region, northeastern Alberta and northwestern Saskatchewan, Canada: Quaternary Science Reviews, v. 28, no. 17-18, p. 1608-1624.
Fréchette, B., Wolfe, A. P., Miller, G. H., Richard, P. J. H., and de Vernal, A., 2006, Vegetation and climate of the last interglacial on Baffin Island, Arctic Canada: Palaeogeography, Palaeoclimatology, Palaeoecology, v. 236, no. 1-2, p. 91-106.
Fulton, R. J., 1995, Proboscidean tusk of Middle Wisconsinan age from sub-till gravel, near Turtle Mountain, southwestern Manitoba, Current Research 1995-E; Geological Survey of Canada, p. 91-96.
Gephart, G. D., 1983, Stratigraphic evidence for a significant readvance of the Michigan ice lobe to the Kalamazoo Moraine - Southwestern Michigan [abstract no. 14780]: Geological Society of America abstracts with programs, v. 15, no. 4, p. 161.
Gephart, G. D., Monaghan, G. W., and Larson, G. J., 1982, A mid-Wisconsinan event in the Lake Michigan Basin [abstract]: Geological Society of America abstracts with programs, v. 14, no. 5, p. 260.
Gratton, D., Gwyn, Q. H. J., and M. Dubois, J. M., 1984, Les paléoenvironnements sédimentaires au Wisconsinien moyen et supérieur, île d’Anticosti, golfe du Saint-Laurent, Québec: Géographie physique et Quaternaire, v. 38, no. 3, p. 229-242.
Guyard, H., St-Onge, G., Pienitz, R., Francus, P., Zolitschka, B., Clarke, G. K. C., Hausmann, S., Salonen, V.-P., Lajeunesse, P., Ledoux, G., and Lamothe, M., 2011, New insights into Late Pleistocene glacial and postglacial history of northernmost Ungava (Canada) from Pingualuit Crater Lake sediments: Quaternary Science Reviews, v. 30, no. 27-28, p. 3892-3907.
Harington, C. R., 2003, Annotated Bibliography of Quaternary Vertebrates of Northern North America, Toronto, University of Toronto Press.
Hill, C. L., 2006, Stratigraphic and geochronologic contexts of mammoth (Mammuthus) and other Pleistocene fauna, Upper Missouri Basin (northern Great Plains and Rocky Mountains), U.S.A: Quaternary International, v. 142-143, p. 87-106.
Hillaire-Marcel, C., 1979, Les mers post-glaciaires du Quebec: quelques aspects: University Pierre et Marie Curie Paris VI, PhD thesis, 293 p.
Hillaire-Marcel, C., and Page, P., 1980, Paléotempératures Isotopiques du Lac Glaciaire de Deschaillons, in Mahaney, W. C., ed., Quaternary Paleoclimate: Norwich, Geo Abstracts Ltd., p. 273-298.
Hodgson, D. A., 1985, The last glaciation of west-central Ellesmere Island, Arctic Archipelago, Canada: Canadian Journal of Earth Sciences, v. 22, no. 3, p. 347-368.
Hughes, O. L., Tarnocai, C., and Schweger, C. E., 1993, Pleistocene stratigraphy, paleopedology, and paleoecology of a multiple till sequence exposed on the Little Bear River, Western District of Mackenzie, N.W.T., Canada: Canadian Journal of Earth Sciences, v. 30, no. 4, p. 851-866.
Huntley, D., Mills, A., and Paulen, R., 2008, Surficial deposits, landforms, glacial history, and reconnaissance drift sampling in the Trout Lake map area, Northwest Territories: Geological Survey of Canada Current Research 2008-14.
Ives, J. D., 1977, Were parts of the north coast of Labrador ice-free at the Wisconsin glacial maximum?: Géographie physique et Quaternaire, v. 31, no. 3-4, p. 401-403.
Ives, J. D., and Buckley, J. T., 1969, Glacial Geomorphology of Remote Peninsula, Baffin Island, N.W.T., Canada: Arctic and Alpine Research, v. 1, no. 2, p. 83-95.
Jackson, L. E., Andriashek, L. D., and Phillips, F. M., 2011, Chapter 45: Limits of Successive Middle and Late Pleistocene Continental Ice Sheets, Interior Plains of Southern and Central Alberta and Adjacent Areas, in Ehlers, J., Gibbard, P. L., and Hughes, P. D., eds., Developments in Quaternary Science Vol.15, Volume 15, Elsevier, p. 575-589.
Jackson, L. E., and Pawson, M., 1984, Alberta Radiocarbon Dates: Listings of radiocarbon dates with regional significance to the late Quaternary geochronology and geomorphology of Alberta: Geological Survey of Canada Paper 83-25.
Jass, C. N., and Beaudoin, A. B., 2014, Radiocarbon Dates of Late Quaternary Megafauna and Botanical Remains from Central Alberta, Canada: Radiocarbon, v. 56, no. 3, p. 1215-1222.
Kaplan, M. R., 1999, The last glaciation of the Cumberland Sound region, Baffin Island, Canada, based on glacial geology, cosmogenic dating, and numerical modeling: Univesity of Colorado, PhD thesis, 206 p.
Karig, D. E., and Miller, N. G., 2013, Middle Wisconsin glacial advance into the Appalachian Plateau, Sixmile Creek, Tompkins Co., NY: Quaternary Research, v. 80, no. 3, p. 522-533.
Karrow, P. F., Seymour, K. L., Miller, B. B., and E., M. J., 1997, Pre-Late Wisconsinian Pleistocene biota from southeastern Michigan, U. S. A.: Palaeogeography, Palaeoclimatology, Palaeoecology, v. 133, p. 81-101.
Karrow, P. F., and Warner, B. G., 1984, A subsurface Middle Wisconsinian interstadial site at Waterloo, Ontario, Canada: Boreas, v. 13, no. 1, p. 67-85.
Kaufman, D. S., and Williams, K. M., 1992, Radiocarbon Date List VII: Baffin Island, N.W.T., Canada: Institute of Arctic and Alpine Research Occasional Paper No. 48.
Kehew, A. E., Beukema, S. P., Bird, B. C., and Kozlowski, A. L., 2005, Fast flow of the Lake Michigan Lobe: evidence from sediment-landform assemblages in southwestern Michigan, USA: Quaternary Science Reviews, v. 24, no. 22, p. 2335-2353.
Lakeman, T. R., 2012, Quaternary glaciation of central Banks Island, NT, Canada: University of Alberta, PhD thesis, 203 p.
Lamothe, M., 1985, Lithostratigraphy And Geochronology Of The Quaternary Deposits Of The Pierreville And St-pierre Les Becquets Areas, Quebec: University of Western Ontario, PhD thesis, 224 p.
Lamothe, M., Hillaire-Marcel, C., and Pagé, P., 1983, Découverte de concrétions calcaires striées dans le till de Gentilly, basses-terres du Saint-Laurent, Québec: Canadian Journal of Earth Sciences, v. 20, no. 3, p. 500-505.
Lamoureux, S. F., and England, J. H., 2000, Late Wisconsinan Glaciation of the Central Sector of the Canadian High Arctic: Quaternary Research, v. 54, no. 2, p. 182-188.
Laymon, C. A., 1991, Marine episodes in Hudson Strait and Hudson Bay, Canada, during the Wisconsin Glaciation: Quaternary Research, v. 35, p. 53-62.
Lemmen, D. S., 1989, The last glaciation of Marvin Peninsula, northern Ellesmere Island, High Arctic, Canada: Canadian Journal of Earth Sciences, v. 26, no. 12, p. 2578-2590.
Liu, C.-L., Riley, K. M., and Coleman, D. D., 1986, Illinois State Geological Survey Radiocarbon dates IX: Radiocarbon, v. 28, no. 1, p. 110-133.
Liverman, D. G. E., Catto, N. R., and Rutter, N. W., 1989, Laurentide glaciation in west-central Alberta: a single (Late Wisconsin) event: Canadian Journal of Earth Sciences, v. 26, no. 2, p. 266-274.
Lowdon, J. A., and Blake, W. Jr., 1968, Geological survey of Canada Radiocarbon Dates VII: Radiocarbon, v. 10, no. 2, p. 207-245.
Lowdon, J. A., 1970, Geological Survey of Canada Radiocarbon Dates IX: Radiocarbon, v. 12, no. 1, p. 46-86.
Lowdon, J. A., 1973, Geological Survey of Canada Radiocarbon Dates XIII: Geological Survey of Canada Paper 73-7.
Lowdon, J. A., 1975, Geological Survey of Canada Radiocarbon Dates XV: Geological Survey of Canada Paper 75-7.
Lowdon, J. A., 1978, Geological Survey of Canada Radiocarbon Dates XVIII: Geological Survey of Canada Paper 78-7.
Lowdon, J. A., Fyles, J. G. and Blake, W. Jr., 1967, Geological survey of Canada Radiocarbon dates VI: Radiocarbon, v. 9, p. 156-197.
Lowdon, J. A., Robertson, I. M. and Blake, W. Jr., 1977, Geological Survey of Canada Radiocarbon Dates XVII: Geological Survey of Canada Paper 77-7.
Lowdon, J. A., Robertson, I. M., and Blake, W. Jr., 1971, Geological Survey of Canada Radiocarbon Dates XI: Radiocarbon, v. 13, no. 2, p. 255-324.
Lowell, T. V., 1995, The application of radiocarbon age estimates to the dating of glacial sequences: an example from the Miami sublobe, Ohio, U.S.A.: Quaternary Science Reviews, v. 14, no. 1, p. 85-99.
MacKay, J. R., and Matthews, J. V. J., 1983, Pleistocene ice and sand wedges, Hooper Island, Northwest Territories: Canadian Journal of Earth Sciences, v. 20, no. 7, p. 1087-1097.
MacNeill, R. H., 1969, Some dates relating to the dating of the last major ice sheet in Nova Scotia: Maritime Sediments, v. 5, no. 1, p. 3.
Manley, W. F., and Jennings, A. E., 1996, Radiocarbon Date List VIII: Eastern Canadian Arctic, Labrador, Northern Quebec, East Greenland Shelf, Iceland Shelf, and Antarctica: University of Colorado.
Mason, O. K., 2010, Beach Ridge Geomorphology at Cape Grinnell, northern Greenland: A Less Icy Arctic in the Mid-Holocene: Geografisk Tidsskrift-Danish Journal of Geography, v. 110, no. 2, p. 337-355.
McCallum, K. J. and Wittenberg, J., 1968, University of Saskatchewan Radiocarbon Dates V: Radiocarbon, v. 10, no. 2, p. 365-378.
McMartin, I., Campbell, J. E., Dredge, L. A., LeCheminant, A. N., McCurdy, M. W., and Scromeda, N., 2015, Quaternary geology and till composition north of Wager Bay, Nunavut: results from the GEM Wager Bay Surficial Geology Project: Geological Survey of Canada Open File 7748.
McNeely, R., 1989, Geological Survey of Canada Radiocarbon Dates XXVIII: Geological Survey of Canada Paper 88-7.
McNeely, R., 2002, Geological Survey of Canada Radiocarbon Dates XXXIII: Geological Survey of Canada Current Research 2001, p. 1-51.
McNeely, R., 2005, Geological Survey of Canada Radiocarbon Dates XXXIV: Geological Survey of Canada Paper 2005-G1, p. 1-117.
McNeely, R., 2006, Geological Survey of Canada Radiocarbon Dates XXXV: Geological Survey of Canada Paper 2006-G, p. 1-156.
McNeely, R. and Jorgensen, P. K., 1992, Geological Survey of Canada Radiocarbon Dates XXX: Geological Survey of Canada Paper 90-7, p. 1-84
McNeely, R. and Jorgensen, P., K., 1993, Geological Survey of Canada Radiocarbon Dates XXXI: Geological Survey of Canada Paper 91-7.
McNeely, R. and McCuaig, S., 1991, Geological Survey of Canada Radiocarbon Dates XXIX: Geological Survey of Canada Paper 89-7, p. 1-134.
McNeely, R. and Atkinson, D. E., 1995, Geological Survey of Canada Radiocarbon Dates XXXII: Geological Survey of Canada current research paper 1995-G.
Meyer, G. N., 1985, The Wadena till revisited - some new ideas about an old till [abstract no.61638]: Geological Society of America abstracts with programs, v. 17, no. 5, p. 318.
Miller, G. H., 1979, Radiocarbon Date List IV: Baffin Island, N.W.T., Canada: Institute of Arctic and Alpine Research Occasional Paper No. 29.
Miller, G. H., Andrews, J. T., and Short, S. K., 1977, The last interglacial-glacial cycle, Clyde foreland, Baffin Island, N.W.T.: stratigraphy, biostratigraphy, and chronology: Canadian Journal of Earth Sciences, v. 14, no. 12, p. 2824-2857.
Miller, G. H., Mode, W. N., Wolfe, A. P., Sauer, P. E., Bennike, O., Forman, S. L., Short, S. K., and Stafford, T. W. J., 1999, Stratified interglacial lacustrine sediments from Baffin Island, Arctic Canada: chronology and paleoenvironmental implications: Quaternary Science Reviews, v. 18, no. 6, p. 789-810.
Monaghan, G. W., Larson, G. J., and Gephart, G. D., 1986, Late Wisconsin drift stratigraphy of the Lake Michigan Lobe in southwestern Michigan: Geological Society of America Bulletin, v. 97, p. 329-334.
Morlan, R. E., McNeely, R., Schreiner, B. T., and Wolfe, S. A., 2001, Quaternary Date and Vertebrate Faunas in Saskatchewan: Geological Survey of Canada Open File 3888, p. 139.
Munroe, J. S., Perzan, Z. M., and Amidon, W. H., 2016, Cave sediments constrain the latest Pleistocene advance of the Laurentide Ice Sheet in the Champlain Valley, Vermont, USA: Journal of Quaternary Science, v. 31, no. 8, p. e2913.
Murton, J. B., Bateman, M. D., Telka, A. M., Waller, R., Whiteman, C., and Kuzmina, S., 2017, Early to mid Wisconsin Fluvial Deposits and Palaeoenvironment of the Kidluit Formation, Tuktoyaktuk Coastlands, Western Arctic Canada: Permafrost and Periglacial Processes, v. 28, no. 3, p. 523-533.
Ó'Cofaigh, C., England, J., and Zreda, M., 2000, Late Wisconsinan glaciation of southern Eureka Sound: evidence for extensive Innuitian ice in the Canadian High Arctic during the Last Glacial Maximum: Quaternary Science Reviews, v. 19, no. 13, p. 1319-1341.
Olson, E. A., and Broecker, W. S., 1957, Validity of radiocarbon dates in organic samples with ages greater than 25,000 years [abs.]: Geological Society of America Bulletin, v. 68, no. 2, p. 1775-1776.
Olson, E. A., 1959, Lamont natural radiocarbon measurements V: American Journal of Science Radiocarbon Supplement, v. 1, p. 1-28.
Paulen, R. C., Beaudoin, A. B., and Pawlowicz, J. G., 2005, An interstadial Site in the Birch Mountains, North-Central Alberta, CANQUA Program and abstracts p. A66: Winnipeg, Canada.
Reimchen, T. H. F., 1968, Pleistocene mammals from the Saskatchewan gravels in Alberta, Canada: University of Alberta, MSc thesis, 92 p.
Reimer, P. J., Bard, E., Bayliss, A., Beck, J. W., Blackwell, P. G., Bronk Ramsey, C., Buck, C. E., Cheng, H., Edwards, R. L., Friedrich, M., Grootes, P. M., Guilderson, T. P., Haflidason, H., Hajdas, I., Hatté, C., Heaton, T. J., Hoffmann, D. L., Hogg, A. G., Hughen, K. A., Kaiser, K. F., Kromer, B., Manning, S. W., Niu, M., Reimer, R. W., Richards, D. A., Scott, E. M., Southon, J. R., Staff, R.…
Rémillard, A. M., Hétu, B., Bernatchez, P., and Bertran, P., 2013, The Drift des Demoiselles on the Magdalen Islands (Québec, Canada): sedimentological and micromorphological evidence of a Late Wisconsinan glacial diamict: Canadian Journal of Earth Sciences, v. 50, no. 5, p. 545-563.
Rémillard, A. M., St-Onge, G., Bernatchez, P., Hétu, B., Buylaert, J.-P., Murray, A. S., and Lajeunesse, P., 2017, Relative sea-level changes and glacio-isostatic adjustment on the Magdalen Islands archipelago (Atlantic Canada) from MIS 5 to the late Holocene: Quaternary Science Reviews, v. 171, p. 216-233.
Rémillard, A. M., St-Onge, G., Bernatchez, P., Hétu, B., Buylaert, J.-P., Murray, A. S., and Vigneault, B., 2016, Chronology and stratigraphy of the Magdalen Islands archipelago from the last glaciation to the early Holocene: new insights into the glacial and sea-level history of eastern Canada: Boreas, v. 45, no. 4, p. 604-628.
Rieck, R. L., Klasner, J. S., Winters, H. A., and Marlette, P. A., 1991, Glaciotectonic effects on a Middle-Wisconsin boreal fenland peat in Michigan, USA: Boreas, v. 20, p. 155-167.
Rieck, R. L., and Winters, H. A., 1980, Distribution and Significance of Glacially Buried Organic Matter in Michigan's Southern Peninsula: Physical Geography, v. 1, no. 1, p. 74-89.
Rubin, M., and Alexander, C., 1960, U.S. Geological Survey Radiocarbon Dates V: American Journal of Science Radiocarbon Supplement, v. 2, p. 129-185.
Shapiro, B., Drummond, A. J., Rambaut, A., Wilson, M. C., Matheus, P. E., Sher, A. V., Pybus, O. G., Gilbert, M. T. P., Barnes, I., Binladen, J., Willerslev, E., Hansen, A. J., Baryshnikov, G. F., Burns, J. A., Davydov, S., Driver, J. C., Froese, D. G., Harington, C. R., Keddie, G., Kosintsev, P., Kunz, M. L., Martin, L. D., Stephenson, R. O., Storer, J., Tedford, R., Zimov, S., and Cooper, A., 2…
Short, S. K., 1981, Radiocarbon date list I: Labrador and Northern Quebec, Canada: Institute of Arctic and Alpine Research Occasional Paper No. 36.
Sloan, V. F., 1990, The glacial history of central Canon Fiord, west-central Ellesmere Island, arctic Canada: University of Alberta, MSc thesis, 108 p.
Smith, D. G., 1992, Glacial Lake Mackenzie, Mackenzie Valley, Northwest Territoties, Canada: Canadian Journal of Earth Sciences, v. 29, no. 8, p. 1756-1766.
Smith, I. R., 1999, Late Quaternary glacial history of Lake Hazen Basin and eastern Hazen Plateau, northern Ellesmere Island, Nunavut, Canada: Canadian Journal of Earth Sciences, v. 36, no. 9, p. 1547-1565.
Stalker, A. M., 1976, Quaternary Stratigraphy of the Southwestern Canadian Prairies, in Mahaney, W. C., ed., Quaternary Stratigraphy of North America: New York, Dowden, Hutchinson & Ross, p. 381-407.
Steig, E. J., Wolfe, A. P., and Miller, G. H., 1998, Wisconsinan refugia and the glacial history of eastern Baffin Island, Arctic Canada: Coupled evidence from cosmogenic isotopes and lake sediments: Geology, v. 26, no. 9, p. 835-838.
Stewart, M. T., and Mickelson, D. M., 1976, Clay mineralogy and relative age of tills in north-central Wisconsin: Journal of Sedimentary Petrology, v. 46, no. 1, p. 200-205.
Stroup, J. S., Lowell, T. V., and Breckenridge, A., 2013, A model for the demise of large, glacial Lake Ojibway, Ontario and Quebec: Journal of Paleolimnology, v. 50, no. 1, p. 105-121.
Stuiver, M., Heusser, C. J., and Yang, I. C., 1978, North American Glacial History Extended to 75,000 Years Ago: Science, v. 200, no. 4337, p. 16-21.
Stuiver, M., and Reimer, P. J., 1993, Extended 14C data base and revised Calib 3.0 14C age calibration program: Radiocarbon, v. 35, no. 1, p. 215-230.
Vogel, J. C., and Waterbolk, H. T., 1972, Groningen Radiocarbon Dates X: Radiocarbon, v. 14, no. 1, p. 6-110.
Winters, H. A., Alford, J. J., and Rieck, R. L., 1988, The anomalous Roxana Silt and mid-Wisconsinian events in and Near Southern Michigan: Quaternary Research, v. 29, p. 25-35.
Winters, H. A., and Rieck, R. L., 1991, Late Glacial Terrain Transformation in Michigan: Michigan Academian, v. 23, p. 137-148.
Winters, H. A., Rieck, R. L., and Kapp, R. O., 1986, Significance and ages of mid Wisconsinan organic deposits in southern Michigan: Physical Geography, v. 7, no. 4, p. 292-305.
Wolfe, A. P., Fréchette, B., Richard, P. J. H., Miller, G. H., and Forman, S. L., 2000, Paleoecology of a >90,000-year lacustrine sequence from Fog Lake, Baffin Island, Arctic Canada: Quaternary Science Reviews, v. 19, no. 17-18, p. 1677-1699.
Wolfe, A. P., and Härting, J. W., 1996, The late Quaternary development of three ancient tarns on southwestern Cumberland Peninsula, Baffin Island, Arctic Canada: paleolimnological evidence from diatoms and sediment chemistry: Journal of Paleolimnology, v. 15, p. 1-18.
Wyatt, P. H., 1989, The stratigraphy and amino acid chronology of Quaternary sediments in central Hudson Bay Lowland: University of Colorado, MSc thesis, 119 p.
Young, R. A., and Burr, G. S., 2006, Middle Wisconsin glaciation in the Genesee Valley, NY: A stratigraphic record contemporaneous with Heinrich Event, H4: Geomorphology, v. 75, no. 1-2, p. 226-247.
Young, R. R., Burns, J. A., Rains, R. B., and Schowalter, D. B., 1999, Late Pleistocene glacial geomorphology and environment of the Hand Hills region and southern Alberta, related to Middle Wisconsin fossil prairie dog sites: Canadian Journal of Earth Sciences, v. 36, no. 9, p. 1567-1581.
Young, R. R., Burns, J. A., Smith, D. G., Arnold, L. D., and Rains, R. B., 1994, A single, late Wisconsin, Laurentide glaciation, Edmonton area and southwestern Alberta: Geology, v. 22, p. 683-686.
